1 **RESEARCH ARTICLE**

2 **Characterizing Activity and Thermostability of GH5 Cellulase Chimeras from**  
3 **Mesophilic and Thermophilic Parents**

4

5 Fei Zheng<sup>1,2,#</sup>, Josh V. Vermaas<sup>3,#</sup>, Jie Zheng<sup>1</sup>, Yuan Wang<sup>1</sup>, Tao Tu<sup>1</sup>, Xiaoyu Wang<sup>1,2</sup>,  
6 Xiangming Xie<sup>2</sup>, Bin Yao<sup>1</sup>, Gregg T. Beckham<sup>4\*</sup> and Huiying Luo<sup>1\*</sup>

7

8 <sup>1</sup>From the Key Laboratory for Feed Biotechnology of the Ministry of Agriculture, Feed  
9 Research Institute, Chinese Academy of Agricultural Sciences, Beijing 100081, People's  
10 Republic of China

11 <sup>2</sup>College of Biological Sciences and Biotechnology, Beijing Forestry University, Beijing  
12 100083, People's Republic of China

13 <sup>3</sup>Biosciences Center, National Renewable Energy Laboratory, Golden, CO 80401, USA

14 <sup>4</sup>National Bioenergy Center, National Renewable Energy Laboratory, Golden, CO 80401,  
15 USA

16

17 Running title: Features imparting thermal stability in GH5 cellulases

18

---

19 \*Corresponding authors

20 *E-mail addresses:* [luohuiying@caas.cn](mailto:luohuiying@caas.cn) (H. Luo), [Gregg.Beckham@nrel.gov](mailto:Gregg.Beckham@nrel.gov).

21 #These authors contributed equally to this work.

22

---

23 **ABSTRACT**

24 Cellulases from glycoside hydrolase (GH) family 5 are key enzymes in the degradation of  
25 diverse polysaccharide substrates and are used in industrial enzyme cocktails to break down  
26 biomass. The GH5 family shares a canonical  $(\beta\alpha)_8$ -barrel structure, where each  $(\beta\alpha)$  module  
27 is essential for the enzyme stability and activity. Despite their shared topology, the  
28 thermostability of GH5 enzymes can vary significantly, and highly thermostable variants are  
29 often sought for industrial applications. Based on a previously characterized thermophilic  
30 GH5 cellulase from *Talaromyces emersonii* (*TeEgl5A*, with an optimal temperature of 90°C),  
31 we created ten hybrid enzymes with the mesophilic cellulase from *Prostheccium opalus*  
32 (*PoCel5*) to determine which elements are responsible for enhanced thermostability. Five of  
33 the expressed hybrid enzymes exhibit enzyme activity. Two of these hybrids exhibited  
34 pronounced increases in the temperature optima (10 and 20°C),  $T_{50}$  (15 and 19°C),  $T_m$  (16.5  
35 and 22.9°C), and extended half life,  $t_{1/2}$  (~240- and 650-fold at 55°C) relative to the  
36 mesophilic parent enzyme, and demonstrated improved catalytic efficiency on selected  
37 substrates. The successful hybridization strategies were validated experimentally in another  
38 GH5 cellulase from *Aspergillus nidulans* (*AnCel5*), which demonstrated a similar increase in  
39 thermostability. Based on molecular dynamics simulations (MD) of both *PoCel5* and  
40 *TeEgl5A* parent enzymes as well as their hybrids, we hypothesize that improved hydrophobic  
41 packing of the interface between  $\alpha_2$  and  $\alpha_3$  is the primary mechanism by which the hybrid  
42 enzymes increase their thermostability relative to the mesophilic parent *PoCel5*.

43

---

44 **IMPORTANCE**

45 Thermal stability is an essential property of enzymes in many industrial biotechnological  
46 applications, as high temperatures improve bioreactor throughput. Many protein engineering  
47 approaches, such as rational design and directed evolution, have been employed to improve  
48 the thermal properties of mesophilic enzymes. Structure-based recombination has also been  
49 used to fuse TIM-barrel fragments and even fragments from unrelated folds, to generate new  
50 structures. However, there are not many research on GH5 cellulases. In this study, two GH5  
51 cellulases, which showed TIM-barrel structure, *PoCel5* and *TeEgl5A* with different thermal  
52 properties were hybridized to study the roles of different ( $\beta\alpha$ ) motifs. This work illustrates the  
53 role that structure guided recombination can play in helping to identify sequence function  
54 relationships within GH5 enzymes by supplementing natural diversity with synthetic  
55 diversity.

56

57 *Keywords:* GH5 Cellulase; ( $\beta\alpha$ )<sub>8</sub>-barrel structure; structure-based recombination; hybrid  
58 enzymes; thermostability;

59

---

## 60 INTRODUCTION

61 Cellulases are a class of industrially important enzymes that have been widely used for  
62 biotechnological applications (1, 2). A subset of cellulases isolated from thermophilic  
63 microbes are highly thermostable, and display higher cellulolytic activity and half-life at  
64 elevated temperatures, which can in turn improve the economic viability of industrial  
65 processes by increasing enzymatic hydrolysis rates via operation at higher temperature (3, 4).  
66 The GH5 family of endoglucanases is a common component of enzyme cocktails for biomass  
67 conversion, and representatives across this family are able to act on diverse oligosaccharide  
68 substrates (5). The endoglucanase *TeEgl5A* from *Talaromyces emersonii* exhibits the highest  
69 thermostability known so far for this family, with an optimal temperature of 90°C (6).  
70 However, this is an outlier among fungal GH5 enzymes, with the most well characterized  
71 GH5 enzymes, including those from *Piromyces rhizinflata* (*PrEglA*) (7), *Thermoascus*  
72 *aurantiacus* (*TaCel5A*) (8), *Hypocrea jecorina* (*Trichoderma reesei*) (*TrCel5A*) (9),  
73 *Ganoderma lucidum* (*GlCel5A*) (10), and *Aspergillus niger* (*AnCel5A*) (11) exhibiting an  
74 optimal temperature below 70°C. These enzymes are less well suited for some industrial  
75 applications, so engineering a thermostable fungal endoglucanase that retains high catalytic  
76 activity is desirable.

77 Various protein engineering approaches, such as rational design and directed evolution,  
78 have been employed to improve the thermal properties of mesophilic fungal cellulases  
79 (12-14). Among these, SCHEMA, a computational approach to select blocks of sequence  
80 with minimal disruption of residue-residue contacts in the resulting functional hybrids (15),

---

81 offers a useful tool to improve enzyme thermostability. This recombination method has been  
82 used to generate novel recombinant enzymes of  $\beta$ -lactamase,  $\beta$ -glucosidases, and GH6  
83 chimeras with significantly higher activity and thermostability (16-18). Structure-based  
84 fusion subdomains belonging to different proteins are also an effective method for creating  
85 hybrid enzymes with new properties (19).

86 GH5 enzymes consist of an eightfold repeat of  $(\beta\alpha)$  units that form a barrel, a common  
87  $(\beta\alpha)_8$  fold that prior experiments have shown are amenable to improvement through the  
88 combinatorial shuffling of polypeptide segments to improve or add functionalities to the  
89 protein. For example, the N- and C-terminal four  $(\beta\alpha)_4$ -barrels of histidine biosynthetic  
90 enzymes were assembled to give two highly active hybrid enzymes HisAF and HisFA with  
91 the  $(\beta\alpha)_8$  fold (20, 21). A high degree of internal structure was exhibited in these two fusion  
92 proteins. Sequence-function analysis showed that the recombined protein fragments  
93 contributed additively to enzymatic properties in a given chimera (22). In a subsequent  
94 experiment, the half barrel of HisF was replaced with  $(\beta\alpha)_5$ -flavodoxin-like fold from the  
95 unrelated but structurally compatible bacterial response regulator CheY, resulting in a stable  
96 protein with a  $(\beta\alpha)_8$ -like fold (23). Later, a catalytically active form of the symmetrical barrel  
97 was obtained by fusing two copies of the C-terminal half-barrel HisF-C of HisF (24).  
98 Together, these examples suggest that the symmetrical  $(\beta\alpha)_8$  barrels like GH5 enzymes are a  
99 suitable scaffold for engineering new enzyme properties or functionalities (25).

100 In this study, we use the plasticity of the classical  $(\beta\alpha)_8$  barrel fold highlighted above to  
101 probe the relationship between structure and thermostability in fungal GH5 cellulases by

---

102 conducting structure-guided protein engineering. The cellulase *TeEgl5A* from *T. emersonii* (6)  
103 exhibits high thermostability, retaining almost all of the activity after incubation at 70°C for 1  
104 h, although the structural underpinning for thermal tolerance in this enzyme is unknown.  
105 There are many homologous mesophilic proteins. We specifically investigate the cellulase  
106 *PoCel5* from *Prosthecius opalus* 125034 which retains only <20% activity at 70°C for 10  
107 min. *PoCel5* shares the ( $\beta\alpha$ )<sub>8</sub>-barrel structure with *TeEgl5A* along with 51% sequence  
108 identity, but shows a much lower temperature optimum, 60°C relative to 90°C, and has been  
109 shown to be experimentally tractable to work with (26). By using the fusion approach, the  
110 combinations of the first four ( $\beta\alpha$ ) module(s) of *TeEgl5A* were introduced into *PoCel5*,  
111 producing ten hybrid enzymes (Table1, Fig. S1). Two of these hybrids exhibit substantial  
112 improvements in thermostability relative to the mesophilic parent and catalytic efficiency for  
113 specific substrates, which have the potential to lower process costs in industrial  
114 bioconversion processes. The functional roles of this N-terminal sequence were also verified  
115 in another GH5 cellulase from *Aspergillus niger* (11) and its hybrid. With this work, we  
116 determined the structural regions in *TeEgl5A* that contribute to its high thermostability.  
117 Comparative molecular dynamics (MD) simulations suggest that improved hydrophobic  
118 packing of the interface between  $\alpha_2$  and  $\alpha_3$  helices is the primary mechanism behind the  
119 improved hybrid thermostability. These simulations also indicate a *TeEgl5A*-specific  
120 hydrogen-bond network surrounding R52 that may be an attractive target to further improve  
121 GH5 thermostability.

122





---

## 124 RESULTS

125 **Cloning and sequence analysis of *PoCel5*.** A gene fragment, 341 bp in length, was  
126 amplified from the genomic DNA of *P. opalus* CBS 125034, using GH5-specific primers.  
127 The 5' and 3' flanking regions were obtained by TAIL-PCR and assembled with the known  
128 sequence to give full-length *PoCel5* (1062 bp). Sequence analysis indicated that the ORF of  
129 *PoCel5* is interrupted by one intron (69 bp). The cDNA of *PoCel5* contained 993 bp that  
130 encoded a GH5 endoglucanase of 330 amino acids with an estimated molecular mass of 35  
131 kDa and a predicted *pI* value of 4.94. Based on high sequence homology with other GH5  
132 cellulases of known structure, *PoCel5* likely contains only one catalytic domain with a  
133 ( $\beta\alpha$ )<sub>8</sub>-barrel fold. Similarly, N-terminal 19 amino acids were predicted to be a signal peptide,  
134 and three N-linked glycosylation sites (Asn23, Asn64, and Asn76) are possible based on  
135 protein sequence and structure (Fig. 1).

136 **Design and production of a chimeric enzyme library.** The thermophilic *TeEgl5A*  
137 enzyme (temperature optimum at 90°C), exhibits high catalytic efficiency and broad substrate  
138 specificity (6), and shares a common ( $\beta\alpha$ )<sub>8</sub>-barrel fold with *PoCel5*. This ( $\beta\alpha$ )<sub>8</sub>-TIM-barrel  
139 structure is common in 28 GH families, which include xylanases, cellulases, mannanases,  
140 amylases, and triosephosphate isomerases (CAZy; <http://www.cazy.org>) (27), and may have  
141 evolved through gene duplication event as in a previously studied imidazole glycerol  
142 phosphate synthase (28). Catalytic amino acids typical of GH5 cellulases are also shared  
143 between both *TeEgl5A* and *PoCel5*.

---

144 Based on this common structure and functionality, we swapped sequence fragments  
145 between *TeEgl5A* and *PoCel5* to create a chimeric cellulase library. These sequence swaps  
146 occur at the boundary of individual ( $\beta\alpha$ ) modules. Within each module, there is a  $\beta$ -strand  
147 and  $\alpha$ -helix linked together by a  $\beta\alpha$ -loop. For enzymes with a  $(\beta\alpha)_8$  topology, the eight  
148  $\beta$ -strands assemble into a central  $\beta$ -sheet, i.e. the barrel, which is surrounded by eight  
149  $\alpha$ -helices (10). Guided by the enzyme structures, the N-terminal and C-terminal modules of  
150 endoglucanases *TeEgl5A*, *PoCel5*, and *AnCel5A* were used to design twelve fusion proteins,  
151 combinatorically isolating the specific fragments that result in improved thermostability (Fig.  
152 S1 and Table 1).

153 **Expression and purification of *PoCel5* and hybrid enzymes.** Recombinant *PoCel5* was  
154 successfully produced in *P. pastoris* GS115 component cells after a 48-h methanol induction.  
155 The enzyme was purified to electrophoretic homogeneity (Fig. S2a) but with an apparent  
156 molecular mass higher than the predicted value (35 kDa), with glycosylation likely  
157 accounting for the higher molecular weight. After treatment with Endo H to remove  
158 glycosylation, recombinant *PoCel5* migrated as a protein band corresponding to its expected  
159 molecular mass.

160 Five (H4, H5, H6, H8, and H9) of the ten *PoCel5-TeEgl5A* hybrid enzymes exhibited  
161 cellulase activity measured by DNS. In comparison to the wild-type, these active hybrids  
162 showed various protein migration patterns in the gel before and after Endo H treatment to  
163 remove enzyme glycosylation (Fig. S2a). The different numbers of structure-based  
164 *N*-glycosylation sites, four (Asn2, Asn23, Asn63, and Asn76) for H4, two (Asn21 and Asn44)

---

165 for H5, two (Asn2 and Asn23) for H6, one (Asn36) for enzymes H8, and H9, may account  
166 for this variation. After the Endo H treatment, all hybrid enzymes exhibited a molecular mass  
167 equal to their estimated values (Table 1).

168 **Effect of pH.** The effect of pH on the activity and stability of wild-type and hybrid  
169 enzymes was determined using CMC-Na as the substrate. The wild-type and hybrid H4 were  
170 optimally active at pH 5.0, while the others had a pH optimum at 4.0 (Fig. 2a). The enzymes  
171 exhibited pH-dependent stability (Fig. 2b). The wild-type and hybrids H4–H6 retained  
172 long-term activity over a pH range of 4.0 to 7.0 (>80% activity), were largely ineffective and  
173 possibly unfolded at pH 8.0–9.0, but retained >50% activity at pH 10.0–12.0. In contrast,  
174 hybrids H8 and H9 had a broader pH stability range, retaining >70% activity at pH 3.0 to  
175 10.0.

176 **Thermal property analysis.** To determine the optimal temperature of *PoCel5* and hybrids,  
177 their enzyme activities at different temperatures (40–90°C) were determined after a 10 min  
178 reaction with 1% CMC-Na in 100 mM citric acid- $\text{Na}_2\text{HPO}_4$  at optimal pH. The optimal  
179 temperature of wild-type *PoCel5* was determined to be 60°C (Fig. 2c). When replacing the  
180 ( $\beta\alpha$ ) module(s) of *PoCel5* with those from *TeEgl5A*, the temperature optima of all hybrids  
181 were lower than the 90°C for *TeEgl5A*. H4 exhibited maximum activity at 50°C, H5 and H6  
182 had a temperature optimum of 60°C similar to the wild-type, and H8 and H9 showed optimal  
183 activities at 80°C and 70°C, respectively. Significant differences were also seen in their  
184 thermostability (Fig. 2d). When incubated at 70°C, *PoCel5* as well as hybrids H4–H6 lost  
185 activity rapidly, retaining <20% activity within 10 min. By contrast, H8 and H9 retained >60%

186 activity for 1 h, indicating that in this case the replacement of the N-terminal ( $\beta\alpha$ ) module(s)  
187 from the mesophilic *PoCel5* with the thermophilic *TeEgl5A* improved hybrid thermostability.

188 The thermal stability parameters of the wild-type *PoCel5* and *PoCel5-TeEgl5A* hybrids  
189 were also compared (Table 2). The  $T_{50}$ ,  $T_m$ , and  $t_{1/2}$  values at 55°C of *PoCel5* were 57°C,  
190 53.6°C, and 0.4 h, respectively. In comparison to the wild-type, hybrids H6, H8, and H9  
191 show higher  $T_{50}$  (7–19°C increase) and  $T_m$  (7.6–22.9°C increase) values and longer  $t_{1/2}$   
192 (16–650-fold) at 55°C, with H8 and H9 being more thermostable.

193 **Specific activity and kinetics.** GH5 cellulases can often act on multiple substrates,  
194 including glucan substrates as well as birchwood xylan, Avicel, and laminarin (6, 29, 30).  
195 Table 3 shows the activity of the enzyme library on four substrates. Enzymatic digestion was  
196 fastest for barley  $\beta$ -glucan, lichenan, and CMC-Na, with comparatively slow activity when  
197 given locust bean gum as a substrate. The enzymes demonstrated no activity with birchwood  
198 xylan, Avicel, and laminarin, suggesting specificity typical of cellulolytic endoglucanases.  
199 The specific activities of *PoCel5* against barley  $\beta$ -glucan, lichenan, and CMC-Na were higher  
200 than that of hybrids H4–H6 with the replacements of  $\beta_4\alpha_4$  (H4),  $\beta_1\alpha_1 + \beta_2\alpha_2$  (H5), and  $\beta_2\alpha_2 +$   
201  $\beta_3\alpha_3$  (H6), but much lower than that of hybrids H8 and H9 and *TeEgl5A*. These results  
202 indicate that introduction of the N-terminal three (hybrid H8) and four (hybrid H9) blocks of  
203 ( $\beta\alpha$ ) modules of *TeEgl5A* improved the catalytic performance of *PoCel5*. H9 exhibited the  
204 highest specific activities among all enzymes against barley  $\beta$ -glucan, lichenan, and CMC-Na,  
205 which were 20%, 116%, and 160% higher than that of the parental *PoCel5* enzyme,

206 respectively. The improved catalysis is in some cases non-additive, as both H8 and H9  
207 demonstrated improved performance on CMC-Na relative to both parent enzymes.

208 To better understand the effect of different motifs from *TeEgl5A* on the catalytic  
209 performance of *PoCel5*, kinetic studies of the wild-type *PoCel5* and *PoCel5-TeEgl5A*  
210 hybrids were performed using CMC-Na as the substrate at the optimal reaction conditions of  
211 each enzyme (Table 4). The  $K_m$  and  $V_{max}$  values of *PoCel5* were  $4.9 \pm 0.3$  mg/mL and  $647 \pm$   
212  $46.7$  mol/min/mg, respectively, and its catalytic efficiency was  $k_{cat}/K_m$   $76.2 \pm 1.8$  mL/s/mg,  
213 which is lower than that of the EG (118 mL/s/mg) from *Penicillium purpurogenum* (31). The  
214 kinetic values of the hybrids had the same trends as the specific activities. In comparison to  
215 the *PoCel5* parent, hybrids H4–H6 showed decreased substrate affinity (higher  $K_m$  values)  
216 and reduced reaction velocity and turnover rates (lower  $V_{max}$  and  $k_{cat}$  values), while hybrids  
217 H8 and H9 showed greater substrate affinity, reaction velocity, and turnover rates. The  
218 catalytic efficiencies of the hybrids H4–H6 decreased to 17.4–51.4% to that of *PoCel5*, and  
219 those of H8 and H9 increased up to 276%. The H8 and H9 enzymes specifically are in some  
220 sense even more efficient than the thermophilic *TeEgl5A* parent, as they combine the high  
221 affinity of *PoCel5* with the higher turnover rate of *TeEgl5A* for a 2-3 fold improvement in  
222 catalytic efficiency ( $k_{cat}/K_m$ ) relative to either parental enzyme. These findings indicate that  
223 the replacement of different ( $\beta\alpha$ ) modules from *TeEgl5A* could either enhance or prove  
224 deleterious to the function of *PoCel5*, depending on the specific replacements made. The  
225 primary differences in the five *PoCel5-TeEgl5A* hybrids in catalytic performance (substrate  
226 binding, enzyme catalysis, and product dissociation) may be attributed to their structural

227 differences. The hybrids H4–H6 had only one or two ( $\beta\alpha$ ) module(s) from *TeEgl5A*, while  
228 the hybrids H8 and H9 contained three or four ( $\beta\alpha$ ) exogenous modules (Table 1). Hybrids  
229 H5 and H8 had one module difference ( $\beta_1\alpha_1+\beta_2\alpha_2$  vs.  $\beta_1\alpha_1+\beta_2\alpha_2+\beta_3\alpha_3$ ), but varied in  
230 temperature optima (60°C vs. 80°C), thermal stability, and catalytic performance. Based on  
231 these results alone, we conjecture that the  $\beta_3\alpha_3$  module may play a key role in protein  
232 structure and catalysis. However, hybrid H3 (containing the  $\beta_3\alpha_3$  of *TeEgl5A* alone) did not  
233 show improvements in the properties examined in this study. Moreover, the hybrids H4  
234 containing partial segments of the replaced modules of H8 and H9 had no improvement in  
235 stability and catalysis.

236 **Functional verification by *AnCel5* and its hybrids.** To verify the common effect of the  
237 ( $\beta\alpha$ )<sub>1-3</sub> and ( $\beta\alpha$ )<sub>1-4</sub> modules of *TeEgl5A*, the corresponding part of another GH5 cellulase  
238 from *A. nidulans* was also replaced (11). Two hybrid enzymes (*AnCel5*-H1 and *AnCel5*-H2)  
239 were constructed and produced in *P. pastoris* GS115, but only *AnCel5*-H2 showed cellulase  
240 activity. After purification to homogeneity (Fig. S2b), the wild-type *AnCel5* and hybrid  
241 *AnCel5*-H2 were biochemically characterized. Both *AnCel5* and *AnCel5*-H2 were optimally  
242 active at pH 4.0 (Fig. S3a). However, *AnCel5*-H2 showed adaptability and stability over  
243 higher temperatures. It had an optimal temperature of 80°C, 10°C higher than that of the  
244 wild-type *AnCel5* (Fig. S3b). *AnCel5* was stable at temperature  $\leq 60^\circ\text{C}$ , while the hybrid  
245 *AnCel5*-H2 retained stability at 70°C (Fig. S3c). Moreover, *AnCel5* lost activity rapidly at  
246 70°C and 80°C (retaining <10% within 20 min); under the same conditions, *AnCel5*-H2  
247 retained >30% activity after a 1 h-incubation (Fig. S3d). The  $T_{50}$ ,  $T_m$ , and  $t_{1/2}$  (70°C) values of

248 *AnCel5* and *AnCel5-H2* were  $70 \pm 2$  and  $78 \pm 1^\circ\text{C}$ ,  $83.5 \pm 1.0$  and  $87.0 \pm 1.0^\circ\text{C}$ , and  $0.6 \pm 0.1$   
249 and  $9.0 \pm 0.6$  h, respectively. When using CMC-Na as the substrate, *AnCel5* and *AnCel5-H2*  
250 showed a specific activity of  $1818 \pm 26$  and  $2800 \pm 34$  U/mg respectively, similar  $V_{\text{max}}$  ( $2397$   
251  $\pm 57$  vs.  $2486 \pm 36$   $\mu\text{mol}/\text{min}/\text{mg}$ ) and  $k_{\text{cat}}$  ( $1402 \pm 35$  vs.  $1462 \pm 47$  /s) values, but different  
252  $K_{\text{m}}$  values ( $4.2 \pm 0.3$  vs.  $3.4 \pm 0.2$  mg/mL). When combined with the previous results,  
253 selective recombination of different related enzymes can indeed be an effective strategy for  
254 improving the thermal stability and catalytic efficiency of GH5 fungal cellulases.

255 **Mechanism of improved thermostability.** The evidence presented indicates that there are  
256 structural elements unique to the N-terminal region of the thermophilic *TeEgl5A* that enhance  
257 the performance of the enzyme at high temperature. Based on the determined melting  
258 temperatures (Table 2), a region of particular interest would be the interface between  $\beta_2\alpha_2$  and  
259  $\beta_3\alpha_3$ , which when replaced by the *TeEgl5A* equivalent as in H6, raises the melting  
260 temperature relative to unaltered *PoCel5* by nearly  $10^\circ\text{C}$ . Additional  $10\text{--}15^\circ\text{C}$  increases in  
261 the melting temperature when  $\beta_1\alpha_1$  from *TeEgl5A* are also included, as in H8 and H9, but not  
262 when independently replaced, as in H1 and H5, suggest that the  $\beta_1\alpha_1$  module also is involved  
263 in the denaturation process of these hybrid enzymes.

264 To explore which specific interactions may participate in the increased melting points of  
265 specific chimeras, conventional equilibrium MD simulations were performed for models of  
266 H8, H9, as well as both parent enzymes. By varying the simulation temperature from  $25^\circ\text{C}$   
267 ( $298\text{K}$ ) to near the melting point  $70^\circ\text{C}$  ( $343\text{K}$ ) and beyond to  $125^\circ\text{C}$  ( $398\text{K}$ ), we track how  
268 these interactions change with temperature over the course of the five replicates for each

---

269 combination of temperature and protein. By correlating specific interactions with temperature  
270 change across the conformational ensemble created by simulation, we resolve the improved  
271 hydrophobic packing at the interface between modules 2 and 3. Since single simulations are  
272 only 200 ns long, only minimal thermal denaturation is observed. Together, the results from  
273 the MD simulations provide mechanistic insight as to the denaturation process, and how it is  
274 arrested in part in the H8 and H9 hybrids.

275 **Barrel stabilization by hydrogen bond networks.** A commonly invoked mechanism to  
276 improve protein thermostability are rigidifying mutations (32), which would result in  
277 significantly lower fluctuations for specific residues. Using MD simulations, we can directly  
278 test for reduced fluctuations at specific residue positions by computing the root mean squared  
279 fluctuation (RMSF), which measures the mean fluctuation away from the average position of  
280 that residue (Fig. 3). We find that there is a consistent reduction in fluctuation at elevated  
281 temperature only for the original thermophilic *TeEgl5A*, particularly in structured regions  
282 within the  $\beta$ -sheets. The hybrid enzymes, by contrast, have fluctuations in line with what was  
283 observed in *PoCel5*, even in regions where the sequence was identical to *TeEgl5A* ( $\beta_1\alpha_1$ - $\beta_3\alpha_3$   
284 for H8,  $\beta_1\alpha_1$ - $\beta_4\alpha_4$  for H9). Thus, the increased thermostability of H8 and H9 are not strictly  
285 due to rigidifying mutations.

286 Instead, the reduced RMSF for the  $\beta$ -sheets within *TeEgl5A* imply that there are specific  
287 interactions formed within the barrel of *TeEgl5A* that are not present in the *PoCel5* or its  
288 hybrids. From the sequences alone, it is not clear which residues are in close proximity and  
289 might interact across the barrel. *TeEgl5A* sequence introduces a number of charged residues



---

290 within the barrel relative to *PoCel5*, some of which were determined to be protonated at  
291 physiological pH by pKa estimation tools (33) based on their inaccessibility to water and  
292 possible hydrogen bonds that could be made with neighboring residues. The network of  
293 interactions that is formed in *TeEgl5A* (Fig. 4B) directly connects together more structural  
294 elements relative to the interactions seen in *PoCel5* (Fig. 4A), reducing the fluctuation  
295 increases within the central barrel as the temperature rises (Fig. 3). In the hybrid enzymes,  
296 only some of these interactions are retained. There is effectively a Q94D mutation in both H8  
297 and H9 due to the sequence they inherit from *TeEgl5A*. This change relative to *PoCel5* is  
298 sufficient to provide R52 a strong binding partner and significantly lower the fluctuations of  
299 the R52 residue in the hybrids, as indicated by the black arrows in Fig. 3.

300 Other interactions found in *TeEgl5A* that further stabilize the central barrel are missing  
301 from the hybrids. One example occurs at position 201, where H8 and H9 retain Q201 instead  
302 of E201 found in *TeEgl5A*. As a result, neighboring charged residues do not form extended  
303 hydrogen bonding networks as they do in *TeEgl5A* (Fig. 4B), and instead show a lack of  
304 interaction similar to *PoCel5* (Fig. 4A). At low temperatures, the weaker hydrogen bond  
305 networks formed with N13 and sporadic interactions between Q94 and Q201 are sufficient to  
306 stabilize the barrel. However, without the central barrel stabilization brought about by the  
307 additional hydrogen bonds seen in *TeEgl5A*, the barrel exhibits higher fluctuations with  
308 increasing temperature. The extensive *TeEgl5A* interaction network increases thermostability  
309 of the barrel complex, and may be an additional avenue by which thermostability could be

310 further improved, similar to efforts in other fungal cellulases to add hydrogen bonds to  
311 improve thermostability (34, 35).

312 **Specific Interactions in  $\beta_2\alpha_2$  and  $\beta_3\alpha_3$ .** To narrow down what subdomain components are  
313 interacting, we first evaluated hydrogen bonds within the first 4 module sets (Table 5). In this  
314 analysis, we see that *PoCel5* actually creates hydrogen bonds more frequently within the first  
315 4 modules than do the hybrids or the thermophilic enzyme. This difference shrinks when the  
316 same analysis is conducted on the higher temperature simulations (Tables S2 and S3),  
317 indicating that these interactions are not as stable overall. In part, this may be due to the  
318 unexpected hydrogen bond formed between Y77 and V53 in the *TeEgl5A* and the hybrids H8  
319 and H9 (Fig. 4D) but is not present in *PoCel5* (Fig. 4C). This interaction is the only direct  
320 hydrogen bond formed that goes between a helical segment and a beta strand within the first  
321 four modules of the enzyme (Table 5). When combined with the adjacent rigidifying  
322 interactions in the barrel core surrounding R52, this provides part of a mechanism of how  
323 sequence replacement improves thermostability.

324 The hydrogen bond from Y77 to V53 is made possible by other aromatic residues in the  
325 vicinity subtly perturbing the relative orientation of the  $\alpha_2$  and  $\alpha_3$  helices. In *PoCel5*, residue  
326 123 is a tyrosine, which interacts with T78 to satisfy its hydrogen bonding requirements in an  
327 otherwise hydrophobic region of the protein (Fig. 4C). The effective Y123F mutation in the  
328 hybrids and *TeEgl5A*, coupled to N122 hydrogen bonding to S78, creates a hydrophobic  
329 pocket full of favorable  $\pi$ -stacking interactions (Fig. 4D). The stacking interactions maintain  
330 a favorable environment for Y79 without causing a helix rotation that would destroy the

331 structure, in turn causing the carbonyl of V53 to have an alternate hydrogen bonding partner.  
332 These interactions together mean that the hydrophobic packing improves at this interface  
333 relative to the mesophile, a phenomena that has been noted in interaction clusters in other  
334 cellulases (36).

335 An alternative method of quantifying these hydrophobic interactions is to determine the  
336 number of contacts between different structural elements within the enzyme. The overall  
337 contact structure highlights the similar fold between all of the enzymes considered here (Fig.  
338 S4). However, the most revealing aspect of contact analysis occurs when comparing the  
339 number of contacts across different temperatures (Fig. 5). As expected, the number of  
340 observed contacts tends to decrease at high temperature due to the increased fluctuation  
341 computed previously (Fig. 3). The singular clear exception are the contacts between  $\alpha_2$  and  $\alpha_3$ ,  
342 which actually increase with temperature in the hybrids and *TeEgl5A*. The hydrophobic  
343 effect strengthens at higher temperature (37), driving the observed aromatic packing within  
344 the simulations.

## 345 **DISCUSSION**

346 Protein structure and function evolve through sequence changes, substitutions, duplications,  
347 insertions, and deletions, including rearrangement or recombination of short fragments as we  
348 did here, building on earlier work showing that folded hybrid domains can be generated by  
349 shuffling polypeptide segments (38). Based on prior experimental and structural studies  
350 suggesting that the common  $(\beta\alpha)_8$  barrel or TIM barrel evolved from an ancestral half-barrel

351 through a series of duplication, fusion, and diversification events (20, 39), including specific  
352 research in glycoside hydrolases (40, 41), our work here is in effect accelerated evolution  
353 with a particular design goal in mind. The research here is designed to combine the high  
354 substrate affinity of a mesophilic enzyme with the thermostability of a thermophilic enzyme  
355 to produce more efficient enzymes for specific substrates.

356 The key to the success of the improved enzyme variants was replacing the N-terminal half  
357 barrel, as the C-terminal half-barrel hybrid was not functional. This has precedence elsewhere  
358 in the literature for TIM barrel enzymes. In previous study, Purna Sharma and coworkers  
359 reported that a stable and active chimera CelBCelCCA, which showed maximum activity at  
360 70°C and was created by fusion the N-half barrel of the thermophilic CelB (maximum  
361 activity at 95°C) and C-half barrel of mesophilic CelCCA (maximum activity at 50°C) (40).  
362 Furthermore, Numata et al. constructed chimeric isopropylmalate dehydrogenases by  
363 connecting fragments from a thermophilic and a mesophilic parental enzyme. They found  
364 that the thermal stability of the chimeric enzymes was nearly proportional to the fraction of  
365 the sequence coming from the thermophilic enzyme, suggesting that amino acid residues  
366 contributing the thermal stability distribute themselves in the N-terminal half (42). Together  
367 with our results, this suggests that the N-terminal half barrel determines the thermostability of  
368 TIM barrel proteins, possibly by being the first part to unfold completely at the melting  
369 transition, although this was not observed over the short simulation timescales.

370 The observed high activity of two hybrid enzymes on specific substrates was also not  
371 guaranteed. Recombination of the segments between related enzymes often results in hybrids

---

372 with diminished activity. For example, Hosseini-Mazinani and coworkers created 18 hybrid  
373 genes by substituting the coding region of the *P. vulgaris*  $\beta$ -lactamase gene with the  
374 equivalent portions from the RTEM-1 gene (43). Most of these hybrids produced inactive  
375 proteins, and a few hybrid enzymes had partial or trace activity. Even though the previously  
376 mentioned chimera CelBCelCCA displays hyperthermophile-like structural stability, the  
377 chimera activity is significant lower than those of the parental enzymes CelB or CelCCA (40).  
378 Similarly, in our research, half of the ten hybrids showed no activity even though they were  
379 constructed with similar methodology as the other five that were active, implying that more  
380 research will need to be done to determine what are the determinants of chimeric protein  
381 function.

382 To our surprise, two hybrid enzymes (H8 and H9) demonstrated increased the enzyme  
383 specific activity and catalytic efficiency using carboxymethylcellulose sodium (CMC-Na) as  
384 a substrate. Normally, mutants with increased stability often lose catalytic efficiency because  
385 flexibility is required for enzyme activity, whereas structural rigidity improves  
386 thermostability (32, 44). In contrast to this, both H8 and H9 showed improvement on  
387 thermostability and catalytic efficiency, which reduces the enzyme loading (and thereby the  
388 cost) required for production. We suspect that the systematic nature of the SCHEMA  
389 replacement and high structural homology of the TIM barrel proteins resulted in correctly  
390 positioned amino acids that were in the appropriate position for substrate binding and  
391 catalytic bond cleavage after functional domain recombination.

---

392 Parental enzymes that are sufficiently related lend themselves to the construction of hybrid  
393 proteins. Recombination segments or subdomain of proteins lies in the high similarity, thus  
394 the interaction required for the proper structure and function of hybrids will be retained. Then,  
395 recombinants are analyzed in an attempt to identify determinants responsible for parameters  
396 such as thermostability or activity (45). Based on the identity of the modules replaced in  
397 hybrids exhibiting enhanced thermostability, H8 and H9, and to some extent H6, the  
398 reasonable conclusion is that the interfaces between the  $\beta_2$ ,  $\alpha_2$ ,  $\beta_3$ , and  $\alpha_3$  elements within  
399 *PoCel5* are stabilized through hybridization with *TeEgl5A*. In addition, with the results  
400 showing the mechanism behind the melting point improvement of the H8 and H9 hybrids  
401 relative to the progenitor *PoCel5*, we can begin to speculate on the thermal denaturation  
402 mechanism of *PoCel5*. Since the hybrid enzymes strengthened hydrophobic interactions  
403 between the second and third module to improve the melting point, this suggests that native  
404 *PoCel5* unfolding is initiated by water disrupting the packing between  $\alpha_2$  and  $\alpha_3$ . One  
405 potential mechanism seen in simulation is T78 rotating away from its hydrogen bonding  
406 interaction with Y123 when it has the thermal energy to do so, drawing water to interact  
407 closely with Y123. In the H6, H8, and H9 hybrids, increasing the temperature strengthens the  
408 aromatic hydrophobic interactions at this same interface, raising the melting point until  
409 another structural element denatures and disrupts the structure.

410 The order of the relative melting points between H6, H8, and H9 can be used to inform the  
411 order of denaturation. Hybrid H6 has a lower melting point than H8 or H9 while sharing the  
412 thermophilic version of modules 2 and 3, but not module 1. This suggests that a structural

---

413 element in module 1 unfolds first, likely  $\alpha_1$  due to its greater accessibility to solution. After  $\alpha_1$   
414 unfolds,  $\alpha_2$  would then not be packed against it, and may then drift away from  $\alpha_3$ , perturbing  
415 the packing between  $\alpha_2$  and  $\alpha_3$  and leading to enzyme unfolding. Our analysis finds no  
416 specific interactions with the remainder of the enzyme that would stabilize  $\alpha_1$ . Instead, our  
417 hypothesis is much simpler, and is motivated by sequence changes at the N-terminal end of  
418  $\alpha_1$ . Residue 35 of *TeEgl5A* is a proline, compared with a tyrosine in *PoCel5*. Prolines at the  
419 N-terminal end are known to raise the melting point of  $\alpha$ -helices (46-48). Similarly residue 36  
420 of *TeEgl5A* introduces an additional N-glycosylation site relative to *PoCel5*. Glycosylation is  
421 also known to increase the thermostability of  $\alpha$ -helices (49, 50). Together, these changes  
422 maintain the structure of  $\alpha_1$  up to higher temperature, which in turn protects the packing of  
423 the  $\alpha_2$  and  $\alpha_3$  helices.

424 This does not, however, mean that  $\alpha_1$  is the first helix to unfold. Even considering the short  
425 simulated timescales, we observed a loss of structure in  $\alpha_5$  even at modest temperature, as  
426 evidenced by the high RMSF in that part of the protein (Fig. 3). It may be that this helix is  
427 natively in equilibrium between its folded and unfolded states, and that the adjacent residues  
428 were uniquely chosen to form compensatory interactions with the unfolded helix, preserving  
429 the overall structure. Such compensatory interactions would provide a mechanism for the  
430 melting point differential between H8 and H9, since only in H9 is the native  $\alpha_4$ - $\alpha_5$  interface is  
431 disrupted by the sequence changes made. However, another possible explanation is that the  
432 unfolding of  $\alpha_5$  is a modelling artefact of adding in two additional alanines relative to the  
433 homologous crystallographic models.

---

434 In summary, through combinatorial swapping of sequence elements between a mesophilic  
435 and thermophilic cellulase, we created two enzymes with higher efficiency than either of the  
436 parental enzymes. These successful hybrid enzymes demonstrate increased thermostability  
437 relative to the mesophilic parent, while still less than that of a true thermophile. The high  
438 efficiency and improved thermostability may be useful for reducing enzyme loadings within  
439 industrial processes. Through the companion MD simulations performed at a ladder of  
440 temperatures, the interactions that lead to enhanced thermostability have been identified on  
441 the  $\alpha_2$ - $\alpha_3$  interface, which improves residue packing. Recapitulating the R52 interactions  
442 identified with surrounding anionic residues in the thermophilic *TeEgl5A* may be a further  
443 method of stabilizing the newly created hybrid enzymes.

## 444 MATERIALS AND METHODS

445 **Strains, plasmids, and chemicals.** The donor *P. opalus* CBS 125034 strain was cultivated  
446 at 28°C in an inducing medium containing 5 g/L (NH<sub>4</sub>)<sub>2</sub>SO<sub>4</sub>, 1 g/L KH<sub>2</sub>PO<sub>4</sub>, 0.5 g/L  
447 MgSO<sub>4</sub>·7H<sub>2</sub>O, 0.2 g/L CaCl<sub>2</sub>, 10 mg/L FeSO<sub>4</sub>·7H<sub>2</sub>O, 30 g/L corncob, 30 g/L soybean meal,  
448 and 30 g/L wheat bran. *Escherichia coli* Trans I-T1 (TransGen, Beijing, China) was used for  
449 gene cloning and construction of the hybrid enzymes. The vector pPIC9 and *Pichia pastoris*  
450 GS115 from Invitrogen (Carlsbad, CA) was used for enzyme expression. Yeast extract  
451 peptone dextrose (YPD), minimal dextrose (MD), buffered glycerol complex (BMGY), and  
452 buffered methanol complex (BMMY) were prepared according to the *Pichia* Expression Kit  
453 manual (Invitrogen). The FastPfu DNA polymerase from TransGen, restriction  
454 endonucleases from Fermentas (Burlington, Ontario, Canada), T4 DNA ligase from New



---

455 England Biolabs (Hitchin, UK), and BglII from TaKaRa (Kyoto, Japan) were purchased. The  
456 substrates carboxymethyl cellulose-sodium (CMC-Na), barley  $\beta$ -glucan, Avicel, laminarin,  
457 birchwood xylan, and locust bean gum were supplied by Sigma-Aldrich (St. Louis, MO).  
458 Lichenan was purchased from Megazyme (Wicklow, Ireland).

459 **Cloning and sequence analysis of the gene *Pocel5*.** The genomic DNA of *P. opalus* CBS  
460 125034 was extracted using a DNA isolation kit (Tiangen, Beijing, China). The total RNA  
461 was extracted, reverse transcribed, and used as a template for cDNA amplification as  
462 described by Zhao et al. (51). Using the genomic DNA of *P. opalus* CBS 125034 as a  
463 template, the core region of the cellulase-encoding gene *PoCel5* was amplified with a  
464 degenerate primer set GH5-F/GH5-R (Table S1), and its 5'- and 3'- flanking regions were  
465 obtained by thermal asymmetric interlaced (TAIL)-PCR with four arbitrary degenerate  
466 primers from TaKaRa Genome Walking Kit and four nested specific primers (us-1, us-2, ds-1,  
467 and ds-2) (Table S1) designed based on the core region sequence of *PoCel5* (52). The PCR  
468 products were ligated with pEASY-T3 vector for sequencing and assembled to give the  
469 full-length *PoCel5* (GenBank accession number ARO48344). The expression primers  
470 *Pocel5-F/Pocel5-R* with EcoRI and NotI restriction sites (Table S1) were used to amplify the  
471 cDNA fragment coding for mature *PoCel5* without the putative signal peptide sequence. The  
472 PCR product was purified using the Gel Extraction Kit (Omega Bio-tek, Norcross, GA) and  
473 then ligated into the pPIC9 expression vector to produce the recombinant expression vector  
474 pPIC9-*Pocel5*.

---

475 The DNA and amino acid sequences were analyzed using the BLASTx and BLASTp  
476 programs (<http://www.ncbi.nlm.nih.gov/BLAST/>) (53), respectively. The introns, exons, and  
477 transcription initiation sites were predicted using the GENSCAN Web Server  
478 (<http://genes.mit.edu/GENSCAN.html>) (54). SignalP 3.0 was used to predict the signal  
479 peptide sequence (<http://www.cbs.dtu.dk/services/SignalP/>) (55). Sequence assembly and  
480 estimation of the molecular mass and *pI* of the mature peptide were performed using the  
481 Vector NTI Suite 10.0 software (Invitrogen).

482 **Production and purification of the recombinant *PoCel5*.** The recombinant plasmid  
483 pPIC9-*Pocel5* was linearized by BglII and transformed into *P. pastoris* GS115 competent  
484 cells by electroporation. Transformants were selected on plates of minimal dextrose medium  
485 at 30°C for 2 days. The positive clones were grown in shaker tubes containing 3 mL of  
486 BMGY at 30°C for 48 h, followed by cell collection and enzyme induction in 1.5 mL BMMY  
487 containing 0.5% methanol at 30°C for 72 h. The culture supernatant of each transformant was  
488 collected by centrifugation at 12,000 × *g* for 10 min at 4°C and examined by both  
489 SDS-PAGE and a cellulase activity assay. The positive transformants were also verified by  
490 colony PCR and sequencing. For scale-up cultivation, the transformant with highest cellulase  
491 activity was grown in 1-L Erlenmeyer flasks containing 400 mL of BMGY at 30°C for 48 h  
492 with an agitation rate of 200 rpm. Cells were harvested and resuspended in 200 mL of  
493 BMMY containing 0.5% (v/v) methanol for 48-h induction at 30°C.

494 The culture supernatants were collected by centrifugation at 12,000 × *g* for 10 min at 4°C,  
495 followed by ultrafiltration using a vivaflow 50 ultrafiltration membrane with a molecular

---

496 weight cut-off of 10 kDa (Vivascience, Hannover, Germany). The crude enzyme was applied  
497 to HiTrap Q HP anion exchange column (Amersham Biosciences, Uppsala, Sweden)  
498 equilibrated with a 10 mM phosphate buffer of pH 7.5. A linear NaCl gradient of 0 to 1 M  
499 was used to elute the proteins. The apparent molecular mass and purity of purified  
500 recombinant *PoCel5* were estimated by SDS-PAGE. Endo- $\beta$ -*N*-acetylglucosaminidase H  
501 (Endo H) from New England Biolabs was used to remove *N*-glycosylation according to the  
502 manufacturer's instructions.

503 **Enzyme characterization.** The cellulase activity was determined by using the  
504 dinitrosalicylic acid (DNS) method (56). Reactions containing 100  $\mu$ L of properly diluted  
505 protein solution and 900  $\mu$ L 1% (w/v) CMC-Na were incubated at pH 5.0 (100 mM citric  
506 acid- $\text{Na}_2\text{HPO}_4$ ) and 60°C for 10 min, followed by the addition of 1.5 mL DNS solution and 5  
507 min in a boiling water bath. When the reactions cooled to room temperature, the absorbance  
508 at 540 nm was measured. The standard curve for calibrating the enzyme activity was  
509 determined by 0.25–3.5  $\mu$ mol glucose. One unit of enzyme activity was defined as the  
510 amount of enzyme required to release 1  $\mu$ mol of reducing sugars per min. Specific activity  
511 was defined as the enzymatic units per milligram protein.

512 The optimal pH for *PoCel5* was determined at 60°C in 100 mM citric acid- $\text{Na}_2\text{HPO}_4$   
513 buffer ranges of 3.0–8.0. The optimal temperature was determined at pH 5.0 in the  
514 temperature range of 50–90°C. The pH stability was determined by measuring the residual  
515 activity at pH 5.0 (100 mM citric acid- $\text{Na}_2\text{HPO}_4$ ) and 60°C for 10 min after 1-h incubation at  
516 pH 3.0–12.0 and 37°C without CMC-Na. Thermostability was investigated after incubation

517 of the samples at pH 5.0 and 70°C for different periods of time. Residual activity was  
518 measured as described above.

519 Substrate specificity of *PoCel5* was determined by using 1% CMC-Na, barley  $\beta$ -glucan,  
520 lichenan, birchwood xylan, Avicel, laminarin, or 0.5% locust bean gum as the substrate. The  
521 kinetic parameters  $K_m$ ,  $k_{cat}$ ,  $V_{max}$ , and  $k_{cat}/K_m$  were estimated from the *PoCel5* activities at pH  
522 5.0 and 60°C for 5 min by using 1–10 mg/mL CMC-Na as the substrate. GraphPad Prism 6.0  
523 (<http://www.graphpad.com/scientific-software/prism/>) was used to calculate the values by  
524 using the Lineweaver-Burk plot.

525 **Design and construction of the hybrid enzymes.** *PoCel5* shared 51% and 47% sequence  
526 identity with the thermophilic endoglucanase *TeEgl5A* (GenBank accession number  
527 KF680302) and its N-terminal  $(\beta\alpha)_4$  modules (Fig.1), respectively. By using the fusion  
528 protein method, the N-terminal  $(\beta\alpha)_{1-4}$  module(s) or the C-terminal  $(\beta\alpha)_{5-8}$  modules of  
529 *TeEgl5A* were introduced into the corresponding parts of *PoCel5* (Table 1), and a total of 10  
530 hybrid enzymes were constructed. To further verify the functional roles of the N-terminal  
531 sequence of *TeEgl5A* in another GH5 cellulase, *AnCel5* (GenBank accession number  
532 AAG50051) from *Aspergillus niger* (11) sharing 56% identity with *PoCel5* and 67% identity  
533 with *TeEgl5A* was selected, and hybrid enzymes were constructed by replacing the  
534 N-terminal  $(\beta\alpha)_{1-3}$  and  $(\beta\alpha)_{1-4}$  modules, analogous to hybrids H8 and H9 with *PoCel5*.

535 All the fusion proteins were obtained by a two-step overlap extension PCR (Fig. S1). In the  
536 first-step PCR, parallel reactions were performed to amplify the objective DNA fragments

---

537 using the recombinant plasmids pPIC9-*Teegl5A*, pPIC9-*Pocel5* and pPIC9-*Ancel5* as  
538 templates and primers. The specific recombinations are listed in Table S1. The second-step  
539 PCR was used to amplify the final DNA products with the first-step PCR products as  
540 templates and primer sets F/A and R/B/D (Table S1). The 50- $\mu$ L PCR mixture contained 1  
541  $\mu$ L of each primer, 1  $\mu$ L of Fastpfu Fly DNA Polymerase (TransStart, Beijing, China), 5  $\mu$ L  
542 of dNTPs, 10  $\mu$ L of Fastpfu Fly buffer, 3  $\mu$ L of  $MgSO_4$ , 1  $\mu$ L of template DNA, and 28  $\mu$ L of  
543 ddH<sub>2</sub>O. The PCR protocol contained an initial denaturation at 95°C for 5 min, followed by 30  
544 cycles of 94°C for 30 s, annealing at 60°C for 30 s, and elongation at 72°C for 60 s, with a  
545 final extension at 72°C for 10 min. The PCR products were purified, digested with EcoRI and  
546 NotI, ligated into the pPIC9 expression vector, and sequenced. The production, purification,  
547 and characterization of hybrid enzymes followed the same procedures of recombinant  
548 *PoCel5A*.

549 **Thermal stability analysis.** For short-term thermostability analysis, the purified  
550 recombinant wild-type and hybrid enzymes were incubated at 70°C and/or 80°C and optimal  
551 pH for 1-h without substrate. Samples were taken at specific time points for the cellulase  
552 activity assay under optimal conditions of each enzyme. Three thermodynamic parameters,  
553  $T_{50}$ ,  $t_{1/2}$ , and  $T_m$ , were used to compare the thermal properties of *PoCel5*, *AnCel5*, and their  
554 hybrid enzymes.  $T_{50}$  was defined as the temperature at which a 30-min incubation caused the  
555 protein (0.1 mg/mL) to lose 50% activity, while  $t_{1/2}$  was defined as the half-life of an enzyme  
556 at 55°C (for *PoCel5* and its hybrid enzymes) and 70°C (for *AnCel5* and its hybrid enzymes).  
557 Differential scanning calorimetry (DSC) was used to determine the  $T_m$  values. The Nano DSC

---

558 (TA Instruments) was run at a heating and scanning rate of 1°C/min over a temperature range  
559 of 30 to 90°C. Each sample contained 0.25 mg/mL protein in 10 mM citric acid-Na<sub>2</sub>HPO<sub>4</sub>  
560 buffer (pH 7.5). The test was repeated at least twice.

561 **Molecular dynamics (MD) simulation.** To determine the specific molecular interactions  
562 underlying the observed improvement in thermostability, a series of equilibrium classical  
563 molecular dynamics simulations of modelled GH5 structures were performed using NAMD  
564 2.12 (57). Four GH5 models were constructed, one for each of the *PoCel5* and *TeEgl5A*  
565 parent enzymes as well as for the H8 and H9 chimeras. The creation of the four homology  
566 models used MODELLER 9.19 (58), using PDB structures 5I78 from *Aspergillus niger* (11),  
567 1H1N from *Thermoascus aurantiacus* (59), and 5L9C from *Penicillium verruculosum* as the  
568 structural templates for system construction. These templates all have greater than 50%  
569 sequence identity with each of the four GH5 sequences considered (Fig. 1), which is typically  
570 indicative of strong structural homology (58). Protonation states consistent with the optimal  
571 activity pH (5.0) for each GH5 model were determined using PROPKA 3.1 (33, 60). Since  
572 some of the PDB reference structures feature N-glycosylations (11), which are commonly  
573 found in other glycoside hydrolases (2) in addition to our direct experimental evidence for  
574 glycosylations on our enzymes, between 1 and 3 basic N-glycosylations were added where  
575 appropriate to accessible asparagine residues on each model using the GlyProt webserver (61).  
576 Specifically, *PoCel5* has glycosylations on Asn23, Asn64, and Asn76. *TeEgl5A* has four  
577 glycosylations, on Asn36, Asn 190, Asn219, and Asn267. H8 and H9 each have a single  
578 glycosylation at Asn36. Other asparagine residues were determined to be inaccessible to

---

579 solution. Each of the four complete GH5 models was solvated in a water cube with 80 Å  
580 sides using the SOLVATE plugin of VMD (62).

581 Following construction, each of the four GH5 models was simulated for 10ns where the  
582 alpha carbons were harmonically restrained to their initial positions using a 1 kcal mol<sup>-1</sup> Å<sup>-2</sup>  
583 force constant. This equilibration step permits the placed water molecules and the modelled  
584 side chains to find their preferred orientations and rotameric states given the backbone  
585 structure. The equilibration was performed in a constant pressure and temperature ensemble,  
586 using a Langevin piston (63) as the barostat to maintain 1 atm of isotropic pressure and a  
587 Langevin thermostat (64) set to 298K with a 1ps<sup>-1</sup> coupling coefficient. The CHARMM36  
588 (65, 66) force field was used for protein components, together with the CHARMM36  
589 carbohydrate force field for the glycosylations (67, 68) and the TIP3 water model (69).  
590 Non-bonded terms of the energy function were cut off at 12 Å after a 10 Å switching distance.  
591 Long range electrostatic forces were determined using the particle mesh Ewald method (70,  
592 71) with a 1.2 Å grid spacing.

593 The end state after this short equilibration was then used as the starting point for all  
594 subsequent simulations. For each model, simulations were carried out at three different  
595 temperatures, 298K (25°C), 343K (70°C, near the melting point), and 398K (125°C). To  
596 minimize the impact of the stochastic nature of these simulations on the final conclusions,  
597 each combination of GH5 model and temperature was simulated five times for 200ns each.  
598 The aggregate 4 microseconds of trajectory were then analyzed using a python-enabled build  
599 of VMD (62), using its built-in hydrogen bond analysis tools. Atomic contacts between

600 structural elements were computed using a weighted contacts formula (72, 73), which were  
601 used to identify hydrophobic interactions that are otherwise difficult to quantify.

602 **Acknowledgements:**

603 This work was supported by the National Natural Science Foundation of China (no.  
604 31572446), the Fundamental Research Funds for Central Non-profit Scientific Institution (no.  
605 Y2017JC31), and the National Chicken Industry Technology System of China (no.  
606 CARS-41). GTB thanks the U.S. Department of Energy (DOE) Energy Efficiency and  
607 Renewable Energy (EERE) BioEnergy Technologies Office (BETO) for funding under  
608 Contract No. DE-AC36-08GO28308 the National Renewable Energy Laboratory (NREL).  
609 JVV was supported by the NREL Director's Fellowship funded by the Laboratory Directed  
610 Research and Development (LDRD) program. This work used computing resources provided  
611 by the Extreme Science and Engineering Discovery Environment (XSEDE) (74), which is  
612 supported by National Science Foundation grant number ACI-1548562. Specifically, the  
613 allocation to GTB (TG-MCB090159) was used on Stampede2, which is hosted by the Texas  
614 Advanced Computing Center (TACC) at the University of Texas at Austin. The U.S.  
615 Government retains and the publisher, by accepting the article for publication, acknowledges  
616 that the U.S. Government retains a nonexclusive, paid up, irrevocable, worldwide license to  
617 publish or reproduce the published form of this work, or allow others to do so, for U.S.  
618 Government purposes.



619 **Conflict of interest:** The authors declare that they have no conflicts of interest with the  
620 contents of this article.

621 **Author contributions:** FZ performed the experiments and wrote the manuscript. JVV set up  
622 and analyzed the molecular dynamics trajectories and wrote the manuscript. JZ, YW, TT,  
623 XW and XM helped analyze the data and revised the manuscript. BY, GTB and HL revised  
624 the manuscript. All authors read and approved the final manuscript.

625

626

627

---

628 **REFERENCES**

- 629 1. Kuhad RC, Gupta R, Singh A. 2011. Microbial cellulases and their industrial applications.  
630 Enzyme Res 2011:280696–280696.
- 631 2. Payne CM, Knott BC, Mayes HB, Hansson H, Himmel ME, Sandgren M, Ståhlberg J,  
632 Beckham GT. 2015. Fungal cellulases. Chem Rev 115:1308–1448.
- 633 3. Li DC, Li AN, Papageorgiou AC. 2011. Cellulases from thermophilic fungi: recent  
634 insights and biotechnological potential. Enzyme Res 2011:308730.
- 635 4. Srivastava N, Srivastava M, Mishra PK, Gupta VK, Molina G, Rodriguez-Couto S,  
636 Manikanta A, Ramteke PW. 2018. Applications of fungal cellulases in biofuel production:  
637 advances and limitations. Renew Sustain Energy Rev 82:2379–2386.
- 638 5. Aspeborg H, Coutinho PM, Wang Y, Brumer H, Henrissat B. 2013. Evolution, substrate  
639 specificity and subfamily classification of glycoside hydrolase family 5 (GH5). BMC  
640 Evol Biol 12:186.
- 641 6. Wang K, Luo H, Bai Y, Shi P, Huang H, Xue X, Yao B. 2014. A thermophilic  
642 endo-1,4- $\beta$ -glucanase from *Talaromyces emersonii* CBS394.64 with broad substrate  
643 specificity and great application potentials. Appl Microbiol Biotechnol 98:7051–7060.
- 644 7. Tseng CW, Ko TP, Guo RT, Huang JW, Wang HC, Huang CH, Cheng YS, Wang AH,  
645 Liu JR. 2011. Substrate binding of a GH5 endoglucanase from the ruminal fungus  
646 *Piromyces rhizinflata*. Acta Crystallogr. Sect. F Struct. Biol Cryst Commun 67:1189–  
647 1194.

- 
- 648 8. Lo Leggio L, Larsen S. 2002. The 1.62 Å structure of *Thermoascus aurantiacus*  
649 endoglucanase: completing the structural picture of subfamilies in glycoside hydrolase  
650 family 5. FEBS Lett 523:103–108.
- 651 9. Lee TM, Farrow MF, Arnold FH, Mayo SL. 2011. A structural study of *Hypocrea*  
652 *jecorina* Cel5A. Protein Sci 20:1935–1940.
- 653 10. Liu G, Li Q, Shang N, Huang JW, Ko TP, Liu W, Zheng Y, Han X, Chen Y, Chen CC,  
654 Jin J, Guo RT. 2016. Functional and structural analyses of a 1,4-β-endoglucanase from  
655 *Ganoderma lucidum*. Enzyme Microb Technol 86:67–74.
- 656 11. Yan J, Liu W, Li Y, Lai HL, Zheng Y, Huang JW, Chen CC, Chen Y, Jin J, Li H, zhong  
657 LH, Guo RT. 2016. Functional and structural analysis of *Pichia pastoris*-expressed  
658 *Aspergillus niger* 1,4-β-endoglucanase. Biochem Biophys Res Commun 475:8–12.
- 659 12. Liu W, Zhang XZ, Zhang Z, Zhang YH. 2010. Engineering of *Clostridium*  
660 phytofermentans endoglucanase Cel5A for improved thermostability. Appl Environ  
661 Microbiol 76:4914–4917.
- 662 13. Bayram Akcapinar G, Venturini A, Martelli PL, Casadio R, Sezerman UO. 2015.  
663 Modulating the thermostability of endoglucanase I from *Trichoderma reesei* using  
664 computational approaches. Protein Eng Des Sel 28:127–135.
- 665 14. Zhang J, Shi H, Xu L, Zhu X, Li X. 2015. Site-directed mutagenesis of a  
666 hyperthermophilic endoglucanase Cel12B from *Thermotoga maritima* based on rational  
667 design. PLoS One 10:e0141937.

- 
- 668 15. Voigt CA, Martinez C, Wang ZG, Mayo SL, Arnold FH. 2002. Protein building blocks  
669 preserved by recombination. *Nat Struct Biol* 9:553–558.
- 670 16. Meyer MM, Hochrein L, Arnold FH. 2006. Structure-guided SCHEMA recombination of  
671 distantly related beta-lactamases. *Protein Eng Des Sel* 19:563–570.
- 672 17. Heinzelman P, Snow CD, Wu I, Nguyen C, Villalobos A, Govindarajan S, Minshull J,  
673 Arnold FH. 2009. A family of thermostable fungal cellulases created by structure-guided  
674 recombination. *Proc Natl Acad Sci USA* 106:5610–5615.
- 675 18. Chang CJ, Lee CC, Chan YT, Trudeau DL, Wu MH, Tsai CH, Yu SM, Ho TH, Wang AH,  
676 Hsiao CD, Arnold FH, Chao YC. 2016. Exploring the mechanism responsible for  
677 cellulase thermostability by structure-guided recombination. *PLoS One* 11:e0147485.
- 678 19. Béguin P. 1999. Hybrid enzymes. *Curr Opin Biotechnol* 10:336–340.
- 679 20. Höcker B, Beismann-Driemeyer S, Hettwer S, Lustig A, Sterner R. 2001. Dissection of a  
680 ( $\beta\alpha$ ) 8-barrel enzyme into two folded halves. *Nat Struct Mol Biol* 8:32–36.
- 681 21. Hocker B, Claren J, Sterner R. 2004. Mimicking enzyme evolution by generating new  
682 ( $\beta\alpha$ )8-barrels from ( $\beta\alpha$ )4-half-barrels. *Proc Natl Acad Sci USA* 101:16448–  
683 16453.
- 684 22. Smith MA, Rentmeister A, Snow CD, Wu T, Farrow MF, Mingardon F, Arnold FH. 2012.  
685 A diverse set of family 48 bacterial glycoside hydrolase cellulases created by  
686 structure-guided recombination. *FEBS J* 279:4453–4465.
- 687 23. Bharat TA, Eisenbeis S, Zeth K, Höcker B. 2008. A  $\beta\alpha$ -barrel built by the combination of  
688 fragments from different folds. *Proc Natl Acad Sci USA* 105:9942–9947.

- 
- 689 24. Sperl JM, Rohweder B, Rajendran C, Sterner R. 2013. Establishing catalytic activity on  
690 an artificial ( $\beta\alpha$ )8-barrel protein designed from identical half-barrels. *FEBS Lett*  
691 587:2798–2805.
- 692 25. Huang PS, Feldmeier K, Parmeggiani F, Velasco DAF, Höcker B, Baker D. 2016. De  
693 novo design of a four-fold symmetric TIM-barrel protein with atomic-level accuracy. *Nat*  
694 *Chem Biol* 12:29–34.
- 695 26. Zheng F, Tu T, Wang X, Wang Y, Ma R, Su X, Xie X, Yao B, Luo H. 2018. Enhancing  
696 the catalytic activity of a novel GH5 cellulase GtCel5 from *Gloeophyllum trabeum* CBS  
697 900.73 by site-directed mutagenesis on loop 6. *Biotechnol Biofuels* 11:76.
- 698 27. Lombard V, Golaconda Ramulu H, Drula E, Coutinho PM, Henrissat B. 2014. The  
699 carbohydrate-active enzymes database (CAZy) in 2013. *Nucleic Acids Res* 42:D490–495.
- 700 28. Richter M, Bosnali M, Carstensen L, Seitz T, Durchschlag H, Blanquart S, Merkl R,  
701 Sterner R. 2010. Computational and experimental evidence for the evolution of a  
702 ( $\beta\alpha$ )8-barrel protein from an ancestral quarter-barrel stabilised by disulfide bonds. *J Mol*  
703 *Biol* 398:763–773.
- 704 29. Liu J, Tsai C, Liu J, Cheng K, Cheng C. 2001. The catalytic domain of a *Piromyces*  
705 *rhizinflata* cellulase expressed in *Escherichia coli* was stabilized by the linker peptide of  
706 the enzyme. *Enzyme Microb Technol* 28:582–589.
- 707 30. Manavalan T, Manavalan A, Thangavelu KP, Heese K. 2015. Characterization of a novel  
708 endoglucanase from *Ganoderma lucidum*. *J Basic Microbiol* 55:761–771.

- 
- 709 31. Lee KM, Jeya M, Joo AR, Singh R, Kim IW, Lee JK. 2010. Purification and  
710 characterization of a thermostable endo- $\beta$ -1,4-glucanase from a novel strain of  
711 *Penicillium purpurogenum*. *Enzyme Microb Technol* 46:206–211.
- 712 32. Yu H, Huang H. 2014. Engineering proteins for thermostability through rigidifying  
713 flexible sites. *Biotechnol Adv* 32:308–315.
- 714 33. Olsson MHM, Søndergaard CR, Rostkowski M, Jensen JH. 2011. PROPKA3: consistent  
715 treatment of internal and surface residues in empirical pKa predictions. *J Chem Theory*  
716 *Comput* 7:525–537.
- 717 34. Bayram Akcapinar G, Venturini A, Martelli PL, Casadio R, Sezerman UO. 2015.  
718 Modulating the thermostability of endoglucanase I from *Trichoderma reesei* using  
719 computational approaches. *Protein Eng Des Sel* 28:127–135.
- 720 35. Goedegebuur F, Dankmeyer L, Gualfetti P, Karkehabadi S, Hansson H, Jana S, Huynh V,  
721 Kelemen BR, Kruithof P, Larenas EA, Teunissen PJM, Stahlberg J, Payne CM,  
722 Mitchinson C, Sandgren M. 2017. Improving the thermal stability of cellobiohydrolase  
723 Cel7A from *Hypocrea jecorina* by directed evolution. *J Biol Chem* 292:17418–17430.
- 724 36. Sammond DW, Kastelowitz N, Himmel ME, Yin H, Crowley MF, Bomble YJ. 2016.  
725 Comparing residue clusters from thermophilic and mesophilic enzymes reveals adaptive  
726 mechanisms. *PLoS One* 11:e0145848.
- 727 37. van Dijk E, Hoogeveen A, Abeln S. 2015. The hydrophobic temperature dependence of  
728 amino acids directly calculated from protein structures. *PLoS Comput Biol* 11:e1004277.

- 
- 729 38. Riechmann L, Winter G. 2000. Novel folded protein domains generated by combinatorial  
730 shuffling of polypeptide segments. *Proc Natl Acad Sci USA* 97:10068–10073.
- 731 39. Lang D, Thoma R, Henn-Sax M, Sterner R, Wilmanns M. 2000. Structural evidence for  
732 evolution of the  $\beta/\alpha$  barrel scaffold by gene duplication and fusion. *Science* 289:1546–  
733 1550.
- 734 40. Sharma P, Kaila P, Guptasarma P. 2016. Creation of active TIM barrel enzymes through  
735 genetic fusion of half-barrel domain constructs derived from two distantly related  
736 glycosyl hydrolases. *FEBS J* 283:4340–4356.
- 737 41. Zheng F, Huang H, Wang X, Tu T, Liu Q, Meng K, Wang Y, Su X, Xie X, Luo H. 2016.  
738 Improvement of the catalytic performance of a *Bispora antennata* cellulase by replacing  
739 the N-terminal semi-barrel structure. *Bioresour Technol* 218:279–285.
- 740 42. Numata K, Muro M, Akutsu N, Nosoh Y, Yamagishi A, Oshima T. 1995. Thermal  
741 stability of chimeric isopropylmalate dehydrogenase genes constructed from a  
742 thermophile and a mesophile. *Protein Eng* 8:39–43.
- 743 43. Hosseini-Mazinani SM, Nakajima E, Ihara Y, Kameyama KZ, Sugimoto K. 1996.  
744 Recovery of active beta-lactamases from *Proteus vulgaris* and RTEM-1 hybrid by  
745 random mutagenesis by using a dnaQ strain of *Escherichia coli*. *Antimicrobial Agents*  
746 *and Chemotherapy* 40:2152–2159.
- 747 44. Shoichet BK, Baase WA, Kuroki R, Matthews BW. 1995. A relationship between protein  
748 stability and protein function. *Procnatl AcadsciUSA* 92:452–456.

- 
- 749 45. Conrad B, Hoang V, Polley A, Hofemeister J. 2010. Hybrid *Bacillus amyloliquefaciens* X  
750 *Bacillus licheniformis* alpha-amylases. Construction, properties and sequence  
751 determinants. *Eur J Biochem* 230:481–490.
- 752 46. Takano K, Higashi R, Okada J, Mukaiyama A, Tadokoro T, Koga Y, Kanaya S. 2009.  
753 Proline effect on the thermostability and slow unfolding of a hyperthermophilic protein. *J*  
754 *Biochem* 145:79–85.
- 755 47. Wang K, Luo H, Tian J, Turunen O, Huang H, Shi P, Hua H, Wang C, Wang S, Yao B.  
756 2014. Thermostability improvement of a streptomyces xylanase by introducing proline  
757 and glutamic acid residues. *Appl Environ Microbiol* 80:2158–2165.
- 758 48. Shirke AN, Basore D, Butterfoss GL, Bonneau R, Bystroff C, Gross RA. 2016. Toward  
759 rational thermostabilization of *Aspergillus oryzae* cutinase: insights into catalytic and  
760 structural stability. *Proteins* 84:60–72.
- 761 49. Shental-Bechor D, Levy Y. 2008. Effect of glycosylation on protein folding: a close look  
762 at thermodynamic stabilization. *Proc Natl Acad Sci USA* 105:8256–8261.
- 763 50. Fonseca-Maldonado R, Vieira DS, Alpointi JS, Bonneil E, Thibault P, Ward RJ. 2013.  
764 Engineering the pattern of protein glycosylation modulates the thermostability of a GH11  
765 xylanase. *J Biol Chem* 288:25522–25534.
- 766 51. Zhao J, Shi P, Luo H, Yang P, Zhao H, Bai Y, Huang H, Wang H, Yao B. 2010. An  
767 acidophilic and acid-stable  $\beta$ -mannanase from *Phialophora* sp. P13 with high mannan  
768 hydrolysis activity under simulated gastric conditions. *J Agric Food Chem* 58:3184–3190.



- 769 52. Liu Y-G, Whittier RF. 1995. Thermal asymmetric interlaced PCR: automatable  
770 amplification and sequencing of insert end fragments from P1 and YAC clones for  
771 chromosome walking. *Genomics* 25:674–681.
- 772 53. Johnson M, Zaretskaya I, Raytselis Y, Merezhuk Y, McGinnis S, Madden TL. 2008.  
773 NCBI BLAST: a better web interface. *Nucleic Acids Res* 36:W5–9.
- 774 54. Burge C, Karlin S. 1997. Prediction of complete gene structures in human genomic DNA.  
775 *J Mol Biol* 268:78–94.
- 776 55. Bendtsen JD, Nielsen H, von Heijne G, Brunak S. 2004. Improved prediction of signal  
777 peptides: SignalP 3.0. *J Mol Biol* 340:783–795.
- 778 56. Miller GL. 1959. Use of dinitrosalicylic acid reagent for determination of reducing sugar.  
779 *Anal Chem (Wash.)* 31:426–428.
- 780 57. Phillips JC, Braun R, Wang W, Gumbart J, Tajkhorshid E, Villa E, Chipot C, Skeel RD,  
781 Kalé L, Schulten K. 2005. Scalable molecular dynamics with NAMD. *J Comput Chem*  
782 26:1781–1802.
- 783 58. Webb B, Sali A. 2014. Protein structure modeling with MODELLER. *Methods Mol Biol*  
784 426:145–159.
- 785 59. Van Petegem F, Vandenberghe I, Bhat M, Van Beeumen J. 2002. Atomic resolution  
786 structure of the major endoglucanase from *Thermoascus aurantiacus*. *Biochem Biophys*  
787 *Res Commun* 296:161–166.

- 
- 788 60. Søndergaard CR, Olsson MH, Rostkowski M, Jensen JH. 2011. Improved treatment of  
789 ligands and coupling effects in empirical calculation and rationalization of pKa values. *J*  
790 *Chem Theory Comput* 7:2284–2295.
- 791 61. Bohnelang A, Lieth CWVD. 2005. GlyProt: in silico glycosylation of proteins. *Nucleic*  
792 *Acids Res* 33:W214–W219.
- 793 62. Humphrey W, Dalke A, Schulten K. 1996. VMD: visual molecular dynamics. *J Mol*  
794 *Graph* 14:33–38.
- 795 63. Feller SE, Zhang Y, Pastor RW, Brooks BR. 1998. Constant pressure molecular dynamics  
796 simulation: The Langevin piston method. *J Chem Phys* 103:4613–4621.
- 797 64. Kubo R. 1966. The fluctuation-dissipation theorem. *Rep Prog Phys* 29:255.
- 798 65. Best RB, Zhu X, Shim J, Lopes PE, Mittal J, Feig M, Jr MA. 2012. Optimization of the  
799 additive CHARMM all-atom protein force field targeting improved sampling of the  
800 backbonephi, psi and side-chain chi(1) and chi(2) dihedral angles. *J Chem Theory*  
801 *Comput* 8:3257–3273.
- 802 66. Jing H, Rauscher S, Nawrocki G, Ran T, Feig M, Groot BLD, Grubmüller H, Jr MK.  
803 2017. CHARMM36m: an improved force field for folded and intrinsically disordered  
804 proteins. *Nat Methods* 14:71–73.
- 805 67. Guvench O, Hatcher ER, Venable RM, Pastor RW, Mackerell AD. 2009. CHARMM  
806 additive all-atom force field for glycosidic linkages between hexopyranoses. *J Chem*  
807 *Theory Comput* 5:2353–2370.

- 
- 808 68. Guvench O, Mallajosyula SS, Raman EP, Hatcher E, Vanommeslaeghe K, Foster TJ, Jr  
809 MA. 2011. CHARMM additive all-atom force field for carbohydrate derivatives and its  
810 utility in polysaccharide and carbohydrate-protein modeling. *J Chem Theory Comput*  
811 7:3162–3180.
- 812 69. Jorgensen WL, Chandrasekhar J, Madura JD, Impey RW, Klein ML. 1998. Comparison  
813 of simple potential functions for simulating liquid water. *J Chem Phys* 79:926–935.
- 814 70. Essmann U. 1995. A smooth particle mesh Ewald method. *J. Chem. Phys.*  
815 103:8577-8593.
- 816 71. Darden T, York D, Pedersen L. 1998. Particle mesh Ewald: An N·log(N) method for  
817 Ewald sums in large systems. *J Chem Phys* 98:10089–10092.
- 818 72. Vermaas JV, Petridis L, Qi X, Schulz R, Lindner B, Smith JC. 2015. Mechanism of lignin  
819 inhibition of enzymatic biomass deconstruction. *Biotechnol Biofuels* 8:217.
- 820 73. Vermaas JV, Tajkhorshid E. 2017. Differential membrane binding mechanics of  
821 synaptotagmin isoforms observed in atomic detail. *Biochemistry* 56:281–293.
- 822 74. Towns J, Cockerill T, Dahan M, Foster I, Gaither K, Grimshaw A, Hazlewood V, Lathrop  
823 S, Lifka D, Peterson GD, Roskies R, Scott JR, Wilkens-Diehr N. 2014. XSEDE:  
824 accelerating scientific discovery. *Comput Sci Eng* 16:62–74.

825

826

827 **FIGURE LEGENDS**

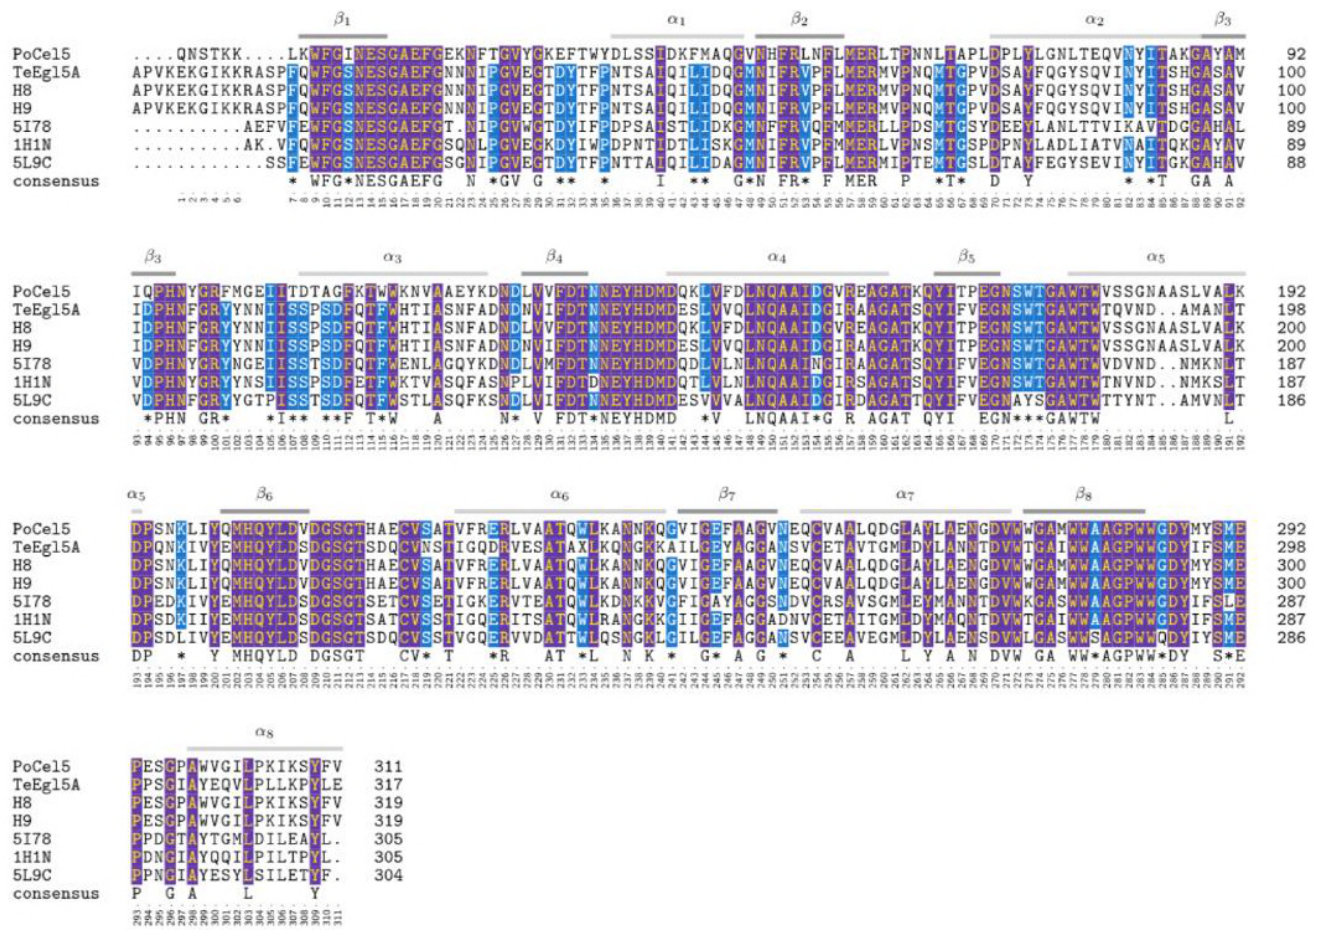

828

829 **FIGURE 1.** Sequence alignment of *PoCel5*, *TeEgl15A*, and their hybrid enzymes H8 and H9

830 and three crystallized GH5 cellulases, 5I78 from *Aspergillus niger* (11), 1H1N from

831 *Thermoascus aurantiacus* (59), and 5L9C from *Penicillium verruculosum*. Residue

832 numbering at the bottom is numbered according to the sequence from *PoCel5*, which is used

833 consistently throughout the text when referring to residue numbers, including for *TeEgl15A*

834 and the hybrids to simplify interaction comparison between enzymes. Module elements are

835 labelled above the sequence. Residues highlighted in purple are identical across all sequences,

836 with residues highlighted in blue being conserved in all but 1 sequence.

837

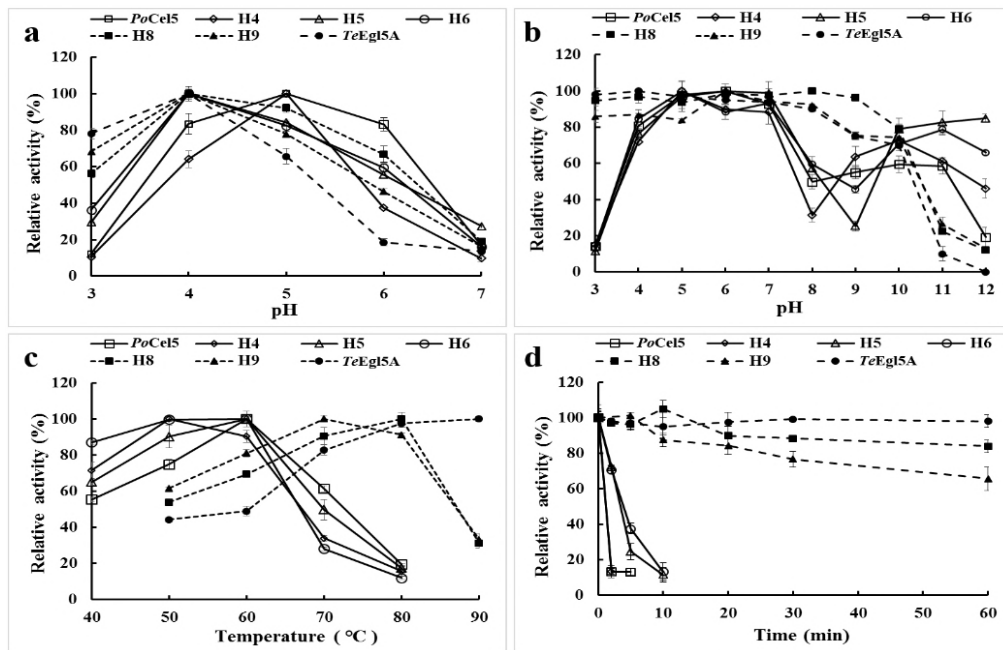

838

839 **FIGURE 2.** Enzyme properties of the purified recombinant *PoCel5*, *TeCel5* and their hybrid  
840 enzymes. The relative activities corresponding to 100% are 351 U/mg for *PoCel5*, 620 U/mg  
841 for *TeEgl5A*, 270 U/mg for H4, 175 U/mg for H5, 101 U/mg for H6, 721 U/mg for H8, and  
842 917 U/mg for H9, respectively, with CMC-Na as the substrate. (a) pH-activity profiles tested  
843 at the optimal temperature of each enzyme (60°C for *PoCel5*, 50°C for H4, H5 and H6, 80°C  
844 for H8, 70°C for H9, and 90°C for *TeEgl5A*). (b) pH-stability profiles. After incubation of the  
845 enzymes at 37°C for 1 h in buffers ranging from pH 3.0 to 12.0, the residual activities were  
846 determined in 100 mM citric acid- $\text{Na}_2\text{HPO}_4$  buffer at optimal pH and optimal temperature of  
847 each enzyme. (c) Temperature-activity profiles tested at the optimal pH of each enzyme (pH  
848 5.0 for *PoCel5* and H4, and pH 4.0 for *TeEgl5A*, H5, H6, H8, and H9). (d)  
849 Temperature-stability profiles. Each enzyme was pre-incubated at 70°C and optimal pH in  
850 100 mM citric acid- $\text{Na}_2\text{HPO}_4$  buffer for different periods of time, and subjected to residual  
851 activity assay under optimal conditions of each enzyme.

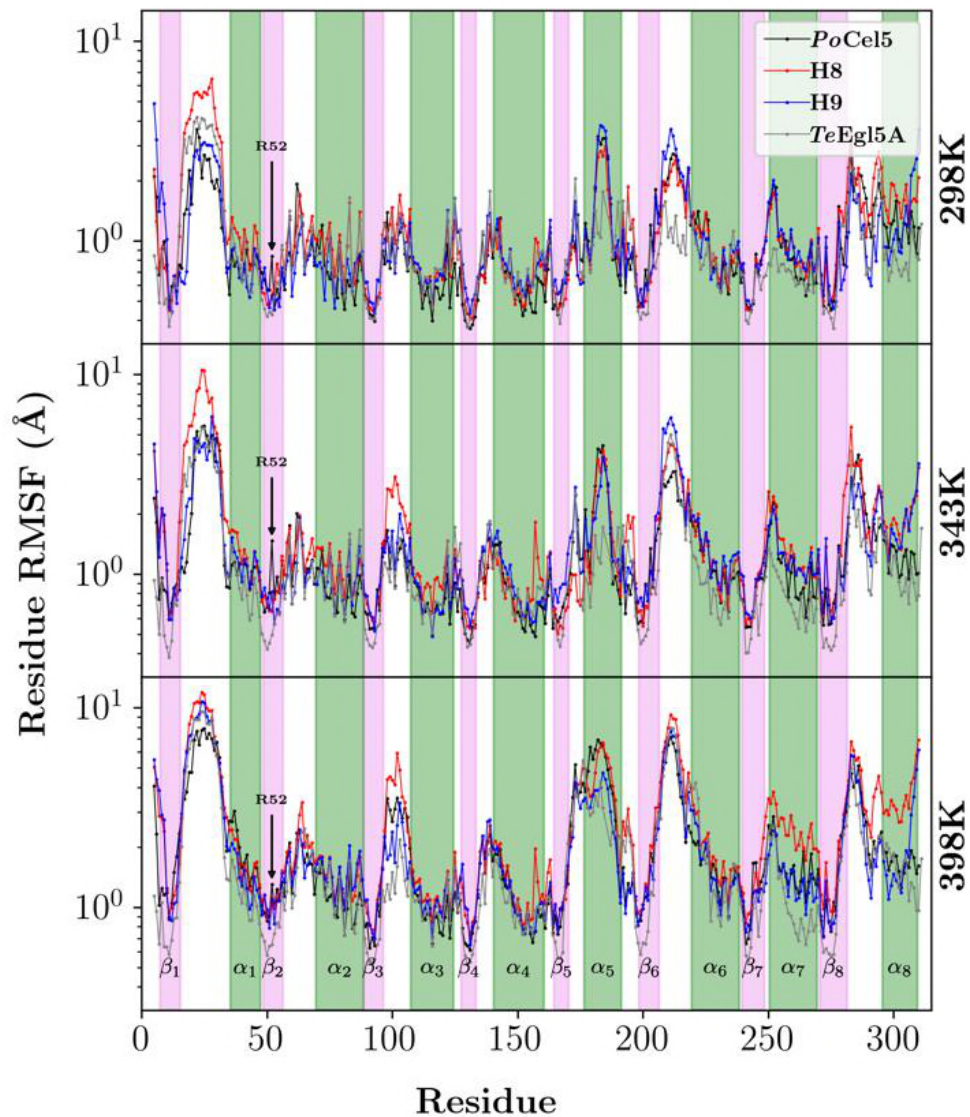

852

853 **FIGURE 3.** Comparative per residue root mean square fluctuation (RMSF) across all  
854 trajectories. The RMSF for each simulated GH5 is presented on three subgraphs (*PoCel5*  
855 black, H8 red, H9 blue, and *TeEgl5A* gray), one for each temperature as indicated. To  
856 highlight the disparity of RMSF between structural elements and the intervening loops, the  
857 eight beta strand regions are highlighted in pink and the eight alpha-helical regions are  
858 highlighted in green, as well as labelled in the 398K subpanel. The elevated RMSF for  
859 *PoCel5* at residue 52 is indicated by a black arrow.

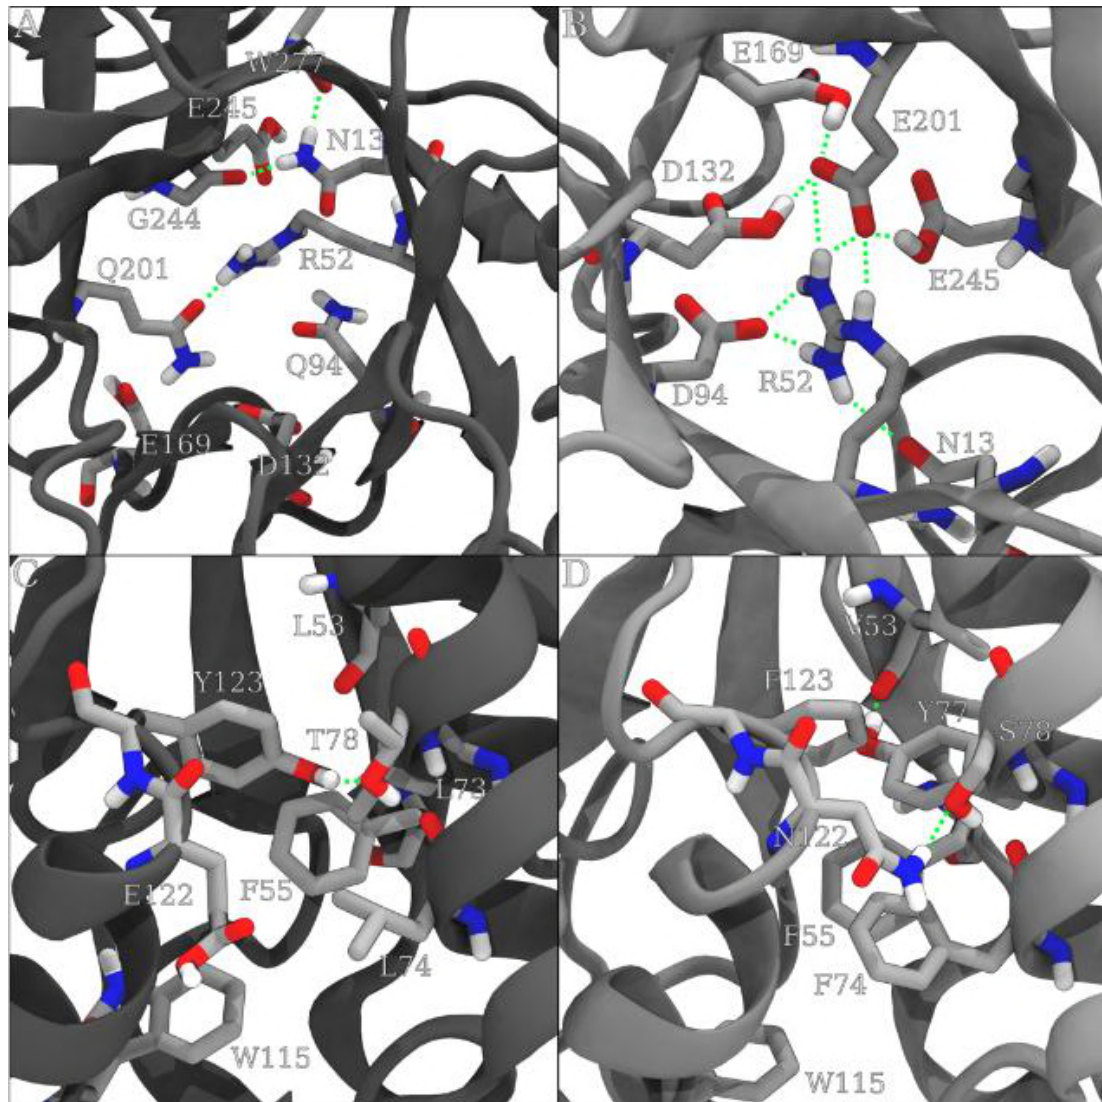

860

861 **FIGURE 4.** Simulation snapshots. In the barrel assembly of *PoCel5* (A) and *TeEgl5A* (B),  
862 we highlight specific interactions around the R52 residue present for each enzyme. For visual  
863 clarity, only heavy atoms and polar hydrogens are shown for the selected residues that form  
864 an extended hydrogen bond network with R52. Along the interface between  $\beta_2\alpha_2\beta_3\alpha_3$ ,  
865 sequence differences between *PoCel5* (C) and *TeEgl5A* (D) lead to different hydrogen bonds  
866 and hydrophobic packing arrangements. The hydrogen bond interactions are shown as green  
867 dashed lines.

868

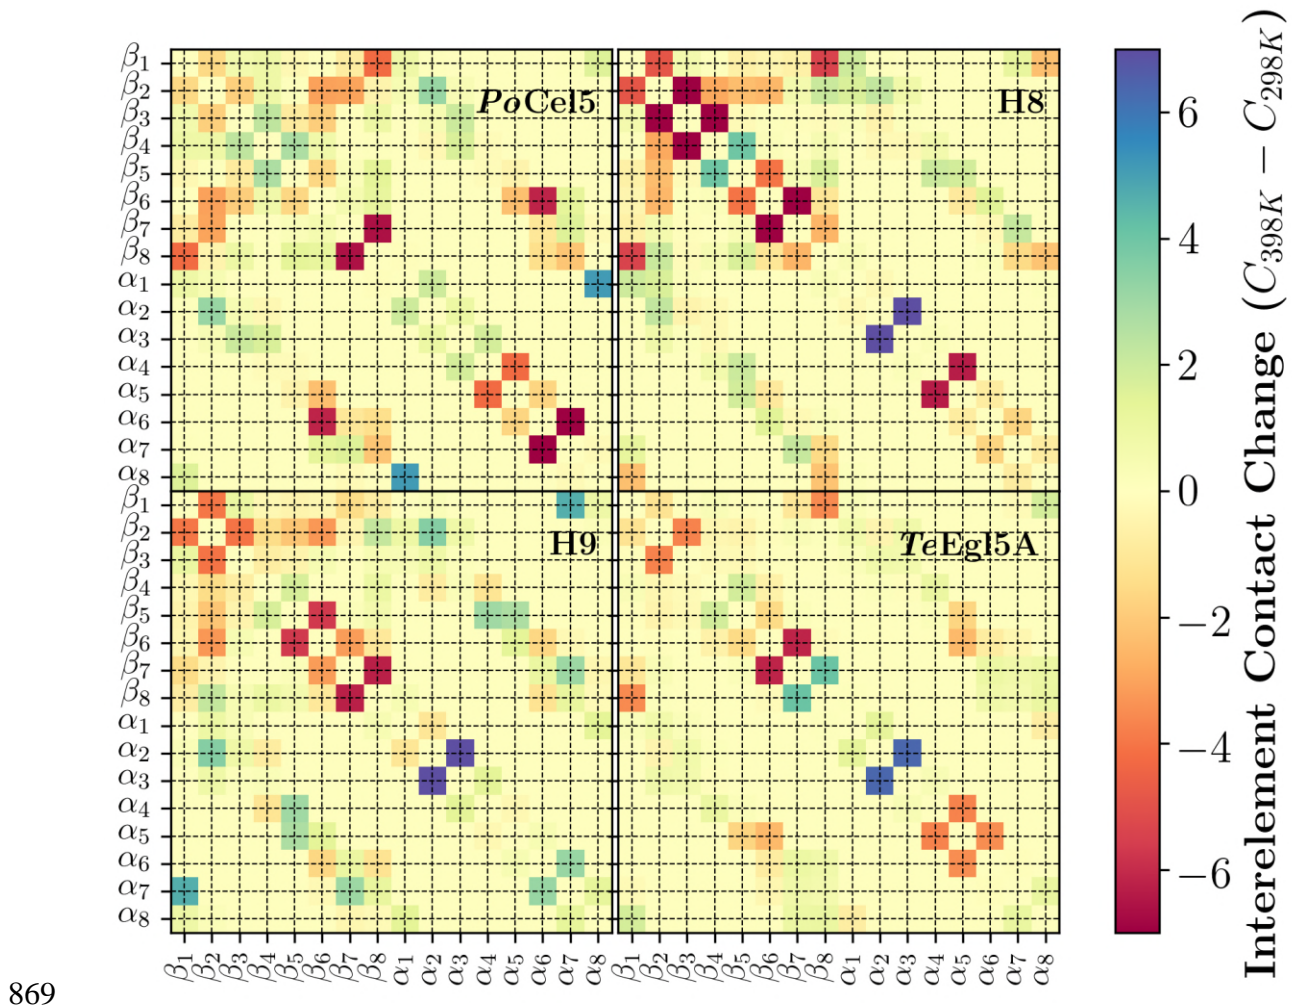

869

870 **FIGURE 5.** Atomic contact change between different structural elements in going from  
871 298K to 398K. Each of the four enzymes studied is labeled in the upper right of each  
872 subpanel, with the colorscale defined on the far right. Contacts were defined between  
873 individual atom pairs that were within 5 Angstroms during simulation, and weighted  
874 according to distance. The weighting function used was  $C(t) = \sum_{pairs} \frac{1}{1 + e^{5(d-4\text{\AA})}}$ ,  
875 where d is the distance between individual atoms in the pair.



## TABLES

**Table 1.** Schematic structures and molecular masses of the *PoCel5*-*TeEgl5A* hybrid enzymes<sup>a</sup>

| Protein | Segment(s)                                                        | The fragment sequence<br>from <i>PoCel5</i> | The fragment sequence<br>from <i>TeEgl5A</i> | Molecular mass<br>(Da) |
|---------|-------------------------------------------------------------------|---------------------------------------------|----------------------------------------------|------------------------|
| H1      | $\beta_1\alpha_1$                                                 | 47–311                                      | 1–54                                         | 35,026                 |
| H2      | $\beta_2\alpha_2$                                                 | 1–49/88–311                                 | 58–95                                        | 35,445                 |
| H3      | $\beta_3\alpha_3$                                                 | 1–89/125–311                                | 98–132                                       | 34,906                 |
| H4      | $\beta_4\alpha_4$                                                 | 1–128/160–311                               | 137–167                                      | 34,921                 |
| H5      | $\beta_1\alpha_1+\beta_2\alpha_2$                                 | 88–311                                      | 1–95                                         | 35,605                 |
| H6      | $\beta_2\alpha_2+\beta_3\alpha_3$                                 | 1–49/125–311                                | 58–132                                       | 34,921                 |
| H7      | $\beta_3\alpha_3+\beta_4\alpha_4$                                 | 1–89/160–311                                | 98–167                                       | 34,801                 |
| H8      | $\beta_1\alpha_1+\beta_2\alpha_2+\beta_3\alpha_3$                 | 125–311                                     | 1–132                                        | 35,485                 |
| H9      | $\beta_1\alpha_1+\beta_2\alpha_2+\beta_3\alpha_3+\beta_4\alpha_4$ | 160–311                                     | 1–167                                        | 35,381                 |
| H10     | $\beta_5\alpha_5+\beta_6\alpha_6+\beta_7\alpha_7+\beta_8\alpha_8$ | 1–159                                       | 168–317                                      | 34,843                 |

<sup>a</sup> Residue numbering relative to the parent sequences

**Table 2:** Thermodynamic properties of *PoCel5* and its hybrid enzymes

| <b>Enzyme</b> | <b><math>T_{50}</math> (°C)</b> | <b><math>T_m</math> (°C)</b> | <b><math>t_{1/2}(55^\circ\text{C})</math> (h)</b> |
|---------------|---------------------------------|------------------------------|---------------------------------------------------|
| <i>PoCel5</i> | $57 \pm 1$                      | $53.6 \pm 1.2$               | $0.40 \pm 0.05$                                   |
| H4            | $58 \pm 2$                      | $51.2 \pm 1.0$               | $0.06 \pm 0.01$                                   |
| H5            | $56 \pm 1$                      | $49.3 \pm 1.1$               | $0.50 \pm 0.04$                                   |
| H6            | $64 \pm 1$                      | $61.2 \pm 1.0$               | $6.5 \pm 2.5$                                     |
| H8            | $76 \pm 2$                      | $76.5 \pm 1.3$               | $260 \pm 3.5$                                     |
| H9            | $72 \pm 2$                      | $70.1 \pm 1.2$               | $96 \pm 1.5$                                      |

**Table 3:** Specific activities of *PoCel5*, *TeEgl5A* and their hybrid enzymes

| <b>Enzymes</b> | <b>Barly <math>\beta</math>-glucan</b> | <b>Lichenan</b> | <b>CMC-Na</b> | <b>Locust bean gum</b> |
|----------------|----------------------------------------|-----------------|---------------|------------------------|
|                | <b>(U/mg)</b>                          | <b>(U/mg)</b>   | <b>(U/mg)</b> | <b>(U/mg)</b>          |
| <i>PoCel5</i>  | 1535 $\pm$ 13                          | 1436 $\pm$ 81   | 351 $\pm$ 6   | 82 $\pm$ 6             |
| <i>TeEgl5A</i> | 2688 $\pm$ 23                          | 3291 $\pm$ 34   | 596 $\pm$ 26  | 96 $\pm$ 13            |
| H4             | 1130 $\pm$ 81                          | 1424 $\pm$ 72   | 270 $\pm$ 11  | 71 $\pm$ 1             |
| H5             | 549 $\pm$ 16                           | 633 $\pm$ 33    | 175 $\pm$ 2   | 30 $\pm$ 2             |
| H6             | 103 $\pm$ 2                            | 159 $\pm$ 19    | 101 $\pm$ 1   | 1.4 $\pm$ 0.1          |
| H8             | 1606 $\pm$ 51                          | 2548 $\pm$ 46   | 722 $\pm$ 30  | 55 $\pm$ 3             |
| H9             | 1844 $\pm$ 87                          | 3107 $\pm$ 122  | 917 $\pm$ 50  | 74 $\pm$ 6             |

**Table 4:** Kinetic parameters of *PoCel5*, *TeEgl5A* and their hybrid enzymes with CMC-Na as the substrate

| <b>Enzymes</b> | <b><math>K_m</math> (mg/mL)</b> | <b><math>V_{max}</math> (<math>\mu\text{mol}/\text{min}/\text{mg}</math>)</b> | <b><math>k_{cat}</math> (/s)</b> | <b><math>k_{cat}/K_m</math> (mL/s/mg)</b> |
|----------------|---------------------------------|-------------------------------------------------------------------------------|----------------------------------|-------------------------------------------|
| <i>PoCel5</i>  | $4.9 \pm 0.3$                   | $647 \pm 47$                                                                  | $378 \pm 31$                     | $76.2 \pm 1.8$                            |
| <i>TeEgl5A</i> | $7.4 \pm 0.6$                   | $1014 \pm 32$                                                                 | $599 \pm 12$                     | $81.2 \pm 4.6$                            |
| H4             | $7.3 \pm 0.1$                   | $352 \pm 7$                                                                   | $205 \pm 4$                      | $28.2 \pm 0.3$                            |
| H5             | $5.1 \pm 0.3$                   | $251 \pm 9$                                                                   | $150 \pm 5$                      | $39.2 \pm 0.9$                            |
| H6             | $7.3 \pm 0.4$                   | $167 \pm 13$                                                                  | $98 \pm 8$                       | $13.3 \pm 0.2$                            |
| H8             | $4.2 \pm 0.3$                   | $1200 \pm 44$                                                                 | $710 \pm 26$                     | $170 \pm 7$                               |
| H9             | $4.0 \pm 0.2$                   | $1445 \pm 107$                                                                | $853 \pm 63$                     | $210 \pm 35$                              |

**Table 5:** Hydrogen bond propensities at 298K across all simulations for residues within the  $\beta_{1-4}$  or  $\alpha_{1-4}$  modules, excluding hydrogen bonds involved in helical interactions. A hydrogen bond is counted only if the heavy atoms are within 3.2 Angstrom and the hydrogen is no more than 30 degrees removed from the direct line between the heavy atoms. To help quickly identify the structural element each residue is found in, the residue identifiers are color coded. Module 1 uses black, module 2 uses blue, module 3 uses green, and module 4 uses red. The lightness of the color indicates whether it is in a  $\beta$  element (dark) or  $\alpha$  (lighter).

| <i>PoCel5</i>     |        | H8             |        | H9             |        | <i>TeEgl5A</i> |        |
|-------------------|--------|----------------|--------|----------------|--------|----------------|--------|
| Donor/Acceptor    | H-bond | Donor/Acceptor | H-bond | Donor/Acceptor | H-bond | Donor/Acceptor | H-bond |
| M88/P47           | 0.93   | R48/D90        | 1.17   | R48/D90        | 1.39   | V88/P47        | 0.95   |
| L49/M88           | 0.91   | D128/D90       | 0.98   | V88/P47        | 0.89   | R48/D90        | 0.92   |
| K113/E154         | 0.86   | V88/P47        | 0.94   | I89/I126       | 0.82   | V49/V88        | 0.87   |
| V126/A87          | 0.85   | V49/V88        | 0.88   | I126/A87       | 0.80   | I89/I126       | 0.87   |
| Q90/L49           | 0.85   | I89/V126       | 0.86   | S86/N45        | 0.80   | P6/N45         | 0.87   |
| K109/D150         | 0.84   | P6/N45         | 0.84   | A87/N124       | 0.76   | E10/R48        | 0.81   |
| Y86/N45           | 0.79   | V126/A87       | 0.83   | E10/R48        | 0.75   | P47/S86        | 0.79   |
| E10/R48           | 0.78   | S86/N45        | 0.75   | D128/D90       | 0.74   | I126/A87       | 0.77   |
| K139/D143         | 0.76   | E10/R48        | 0.73   | V49/V88        | 0.72   | S86/N45        | 0.77   |
| A87/L124          | 0.76   | A87/L124       | 0.72   | P51/D90        | 0.66   | A87/N124       | 0.70   |
| P6/N45            | 0.74   | P47/S86        | 0.71   | Y73/V49        | 0.65   | P51/D90        | 0.68   |
| K109/E154         | 0.73   | P51/D90        | 0.67   | P47/S86        | 0.65   | D107/S104      | 0.65   |
| R48/I8            | 0.71   | Y73/V49        | 0.67   | R48/S8         | 0.63   | R48/N9         | 0.64   |
| R48/N9            | 0.69   | K139/D143      | 0.64   | P6/N45         | 0.63   | D128/I89       | 0.63   |
| P51/Q90           | 0.68   | N45/Q4         | 0.60   | N45/P6         | 0.56   | N45/P6         | 0.53   |
| Y119/T74          | 0.65   | R48/N9         | 0.60   | D128/I89       | 0.47   | Y73/V49        | 0.52   |
| S34/D32           | 0.59   | N45/P6         | 0.60   | Y79/Q37        | 0.41   | R48/S8         | 0.37   |
| Q90/N50           | 0.58   | R48/S8         | 0.58   | D107/S104      | 0.40   | A85/I80        | 0.27   |
| N45/P6            | 0.57   | R48/D128       | 0.52   | N45/Q4         | 0.39   | S8/N9          | 0.27   |
| G107/D104         | 0.56   | D128/I89       | 0.45   | S8/N9          | 0.32   | N45/Q4         | 0.26   |
| N50/E10           | 0.54   | S104/D107      | 0.39   | A85/I80        | 0.30   | S117/T114      | 0.26   |
| K83/D37           | 0.53   | A85/I80        | 0.32   | S104/D107      | 0.29   | P119/A116      | 0.21   |
| P47/Y86           | 0.52   | D107/S104      | 0.31   | R48/N9         | 0.24   | Y79/Q37        | 0.20   |
| N45/K4            | 0.51   | K139/D137      | 0.28   | Q146/D150      | 0.23   | R48/D128       | 0.16   |
| I89/V126          | 0.45   | S8/N9          | 0.26   | N124/A85       | 0.21   | N124/A85       | 0.12   |
| A85/I80           | 0.38   | Y79/Q37        | 0.22   | P119/A116      | 0.21   | Q146/D150      | 0.12   |
| S35/D32           | 0.37   | H83/D41        | 0.22   | S117/T114      | 0.19   | S139/D137      | 0.12   |
| K139/D137         | 0.26   | P119/A116      | 0.17   | S139/D137      | 0.18   | S8/I46         | 0.11   |
| R48/Q90           | 0.21   | Q146/D150      | 0.16   | R48/D128       | 0.13   | Q37/Y79        | 0.11   |
| Q42/P39           | 0.20   | D90/V49        | 0.15   | D90/V49        | 0.12   | Y69/D66        | 0.08   |
| Top 30:           | 18.79  |                | 17.20  |                | 15.56  |                | 14.61  |
| All Interactions: | 20.15  |                | 18.77  |                | 17.12  |                | 15.82  |



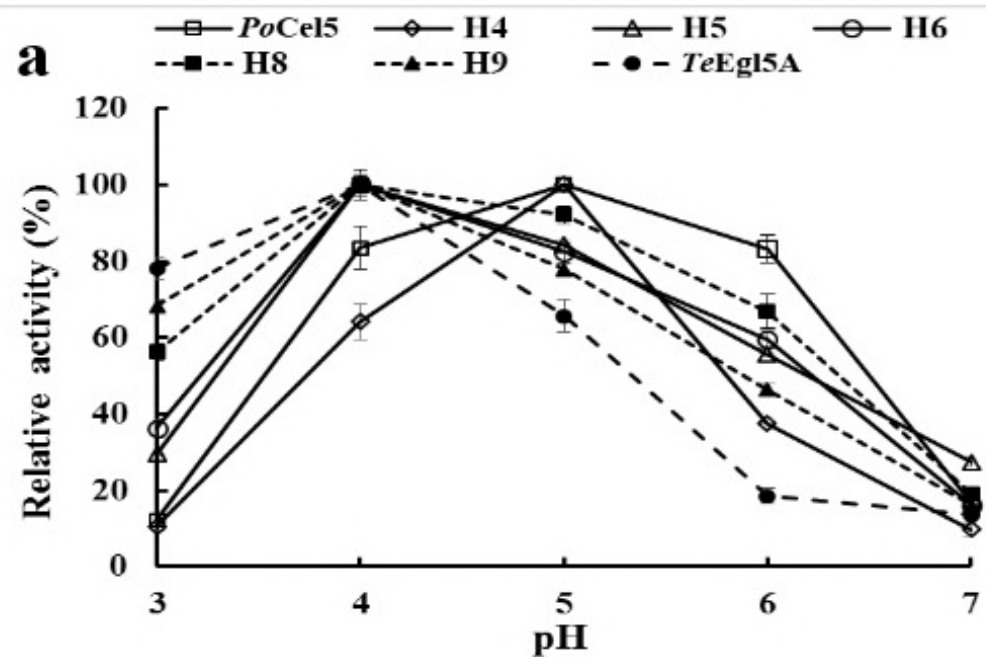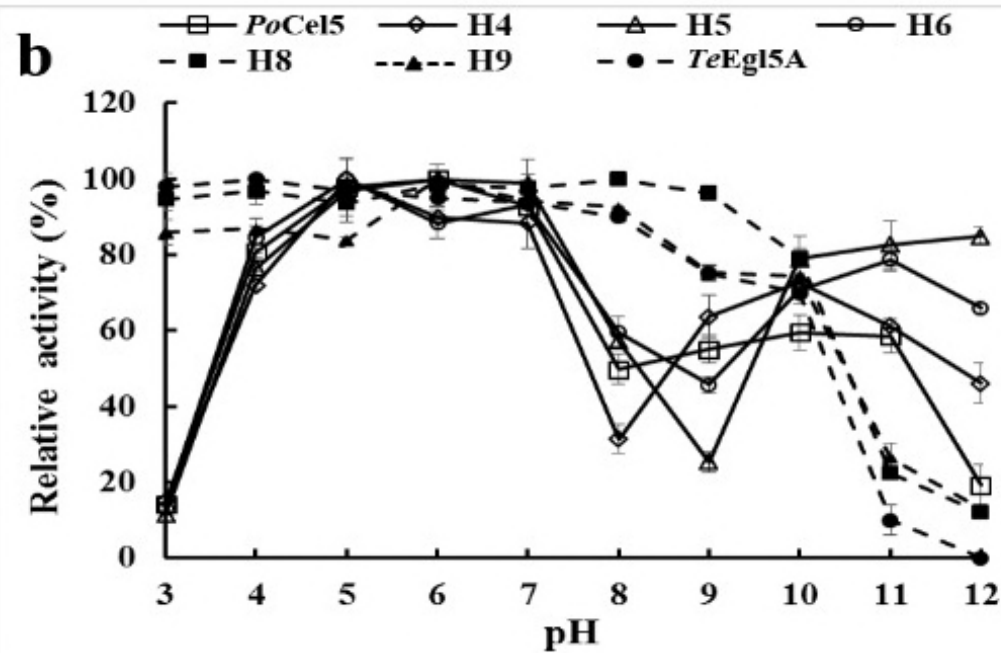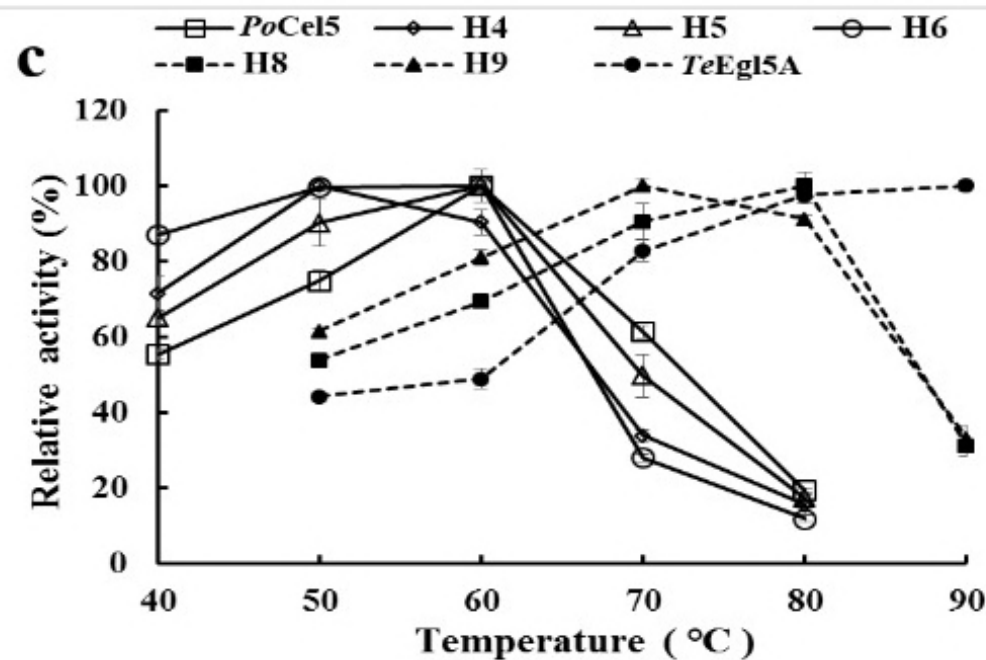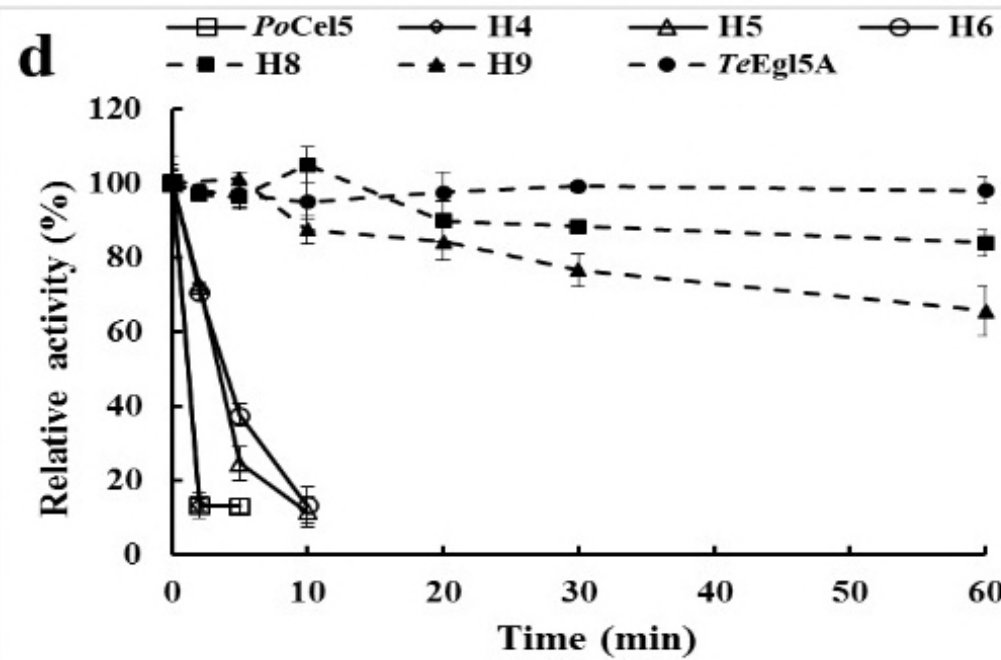

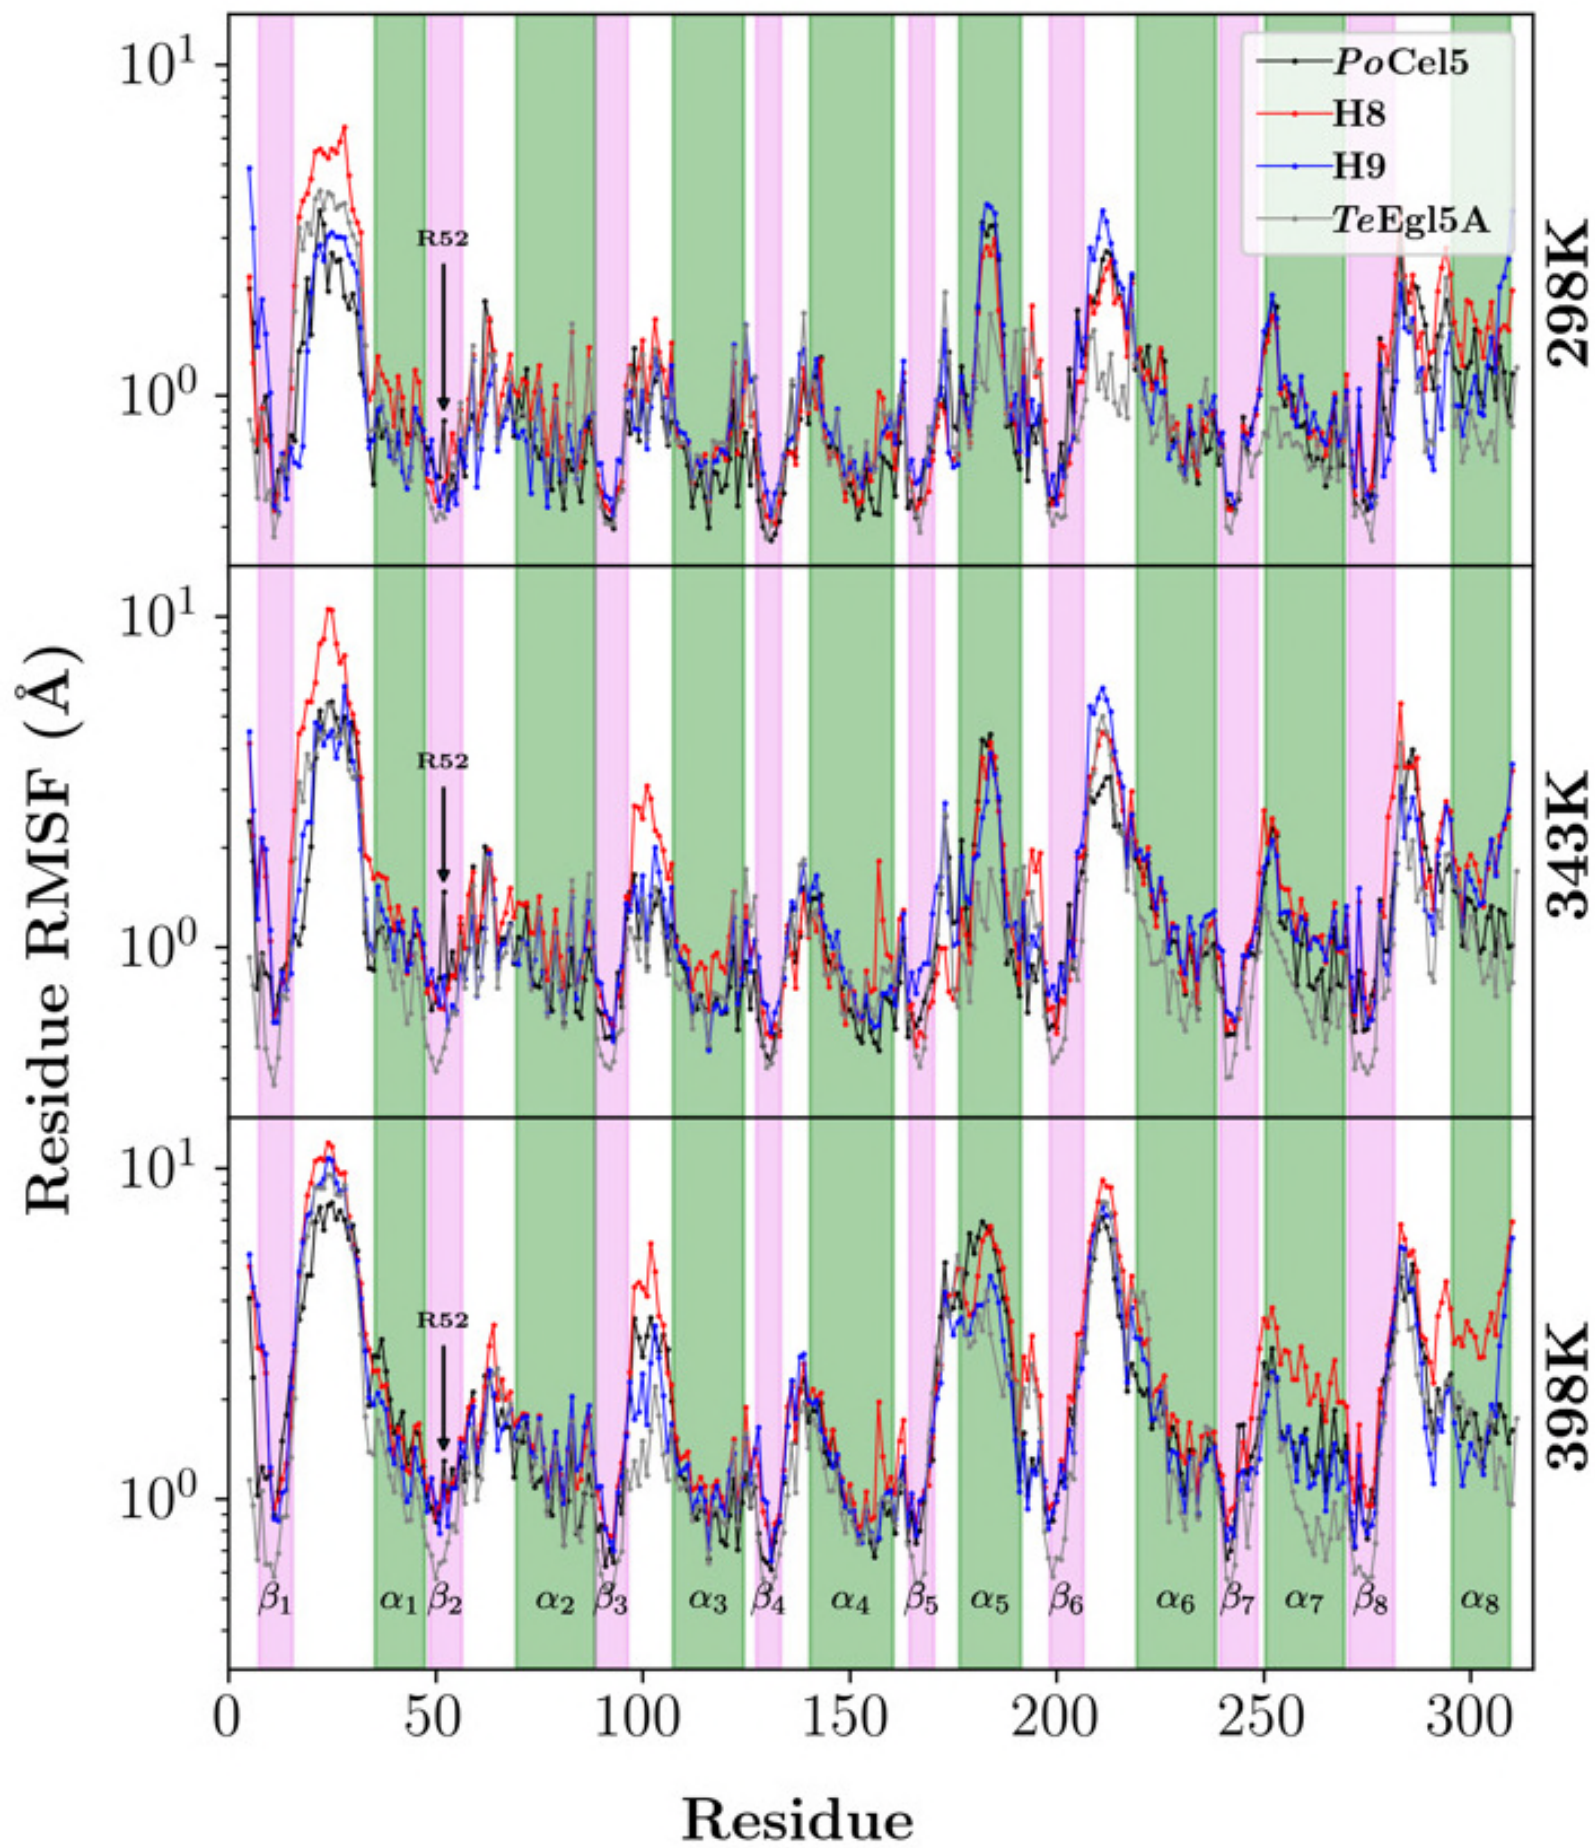



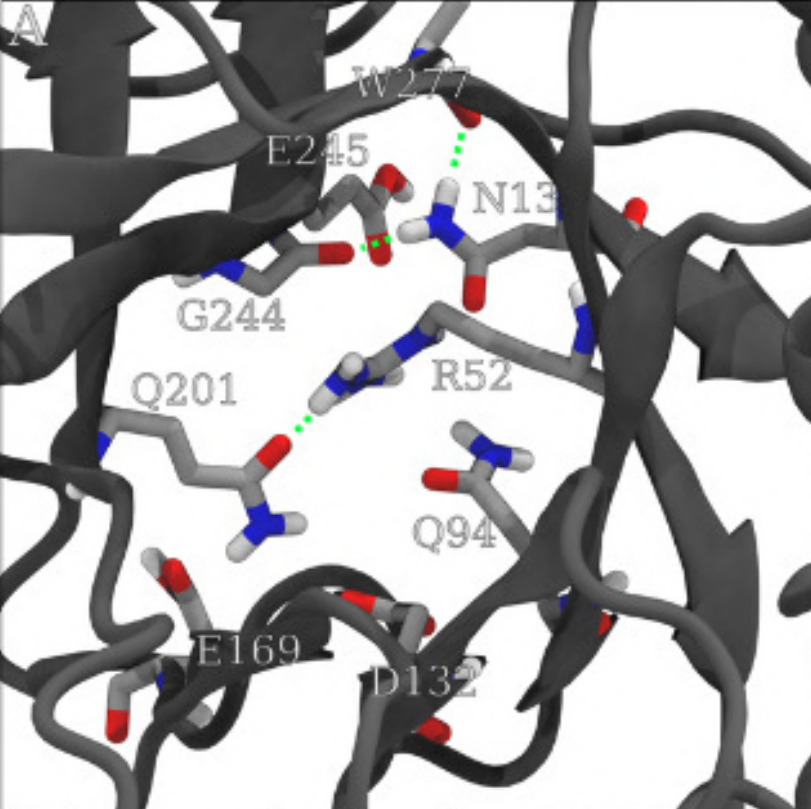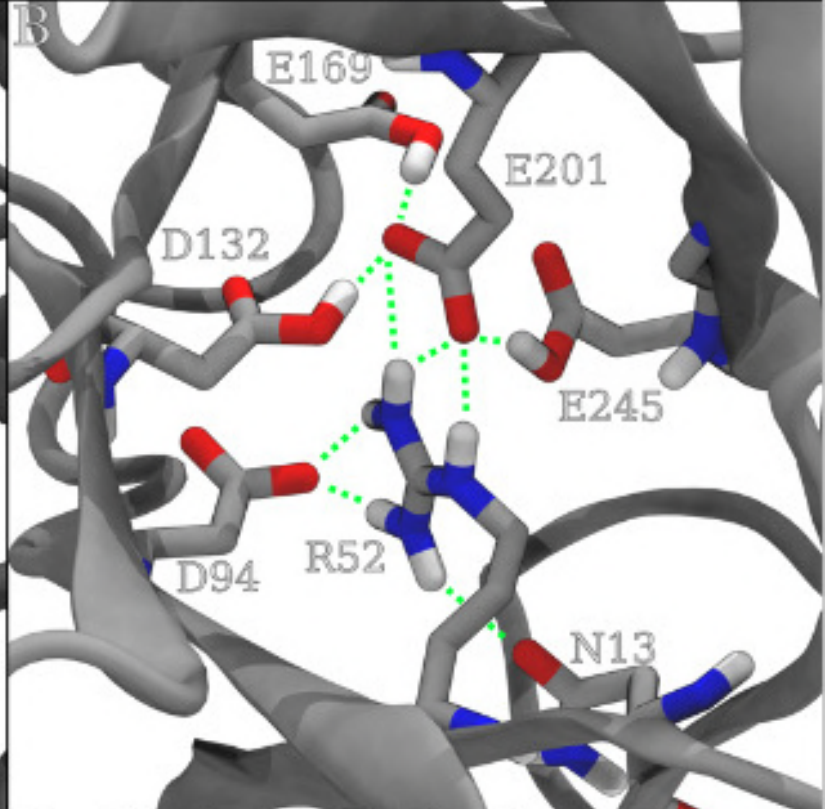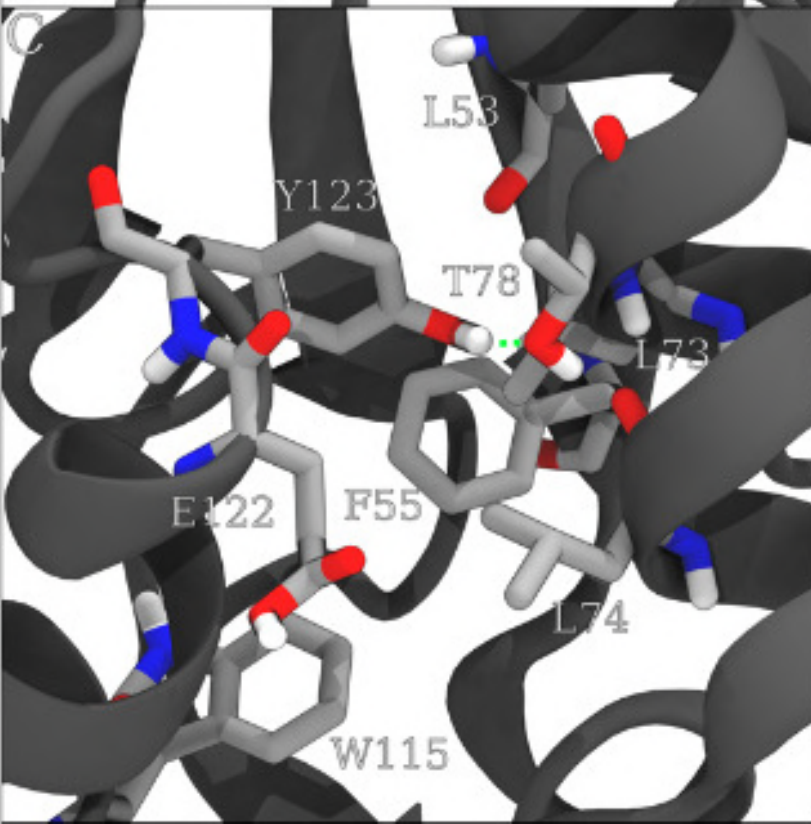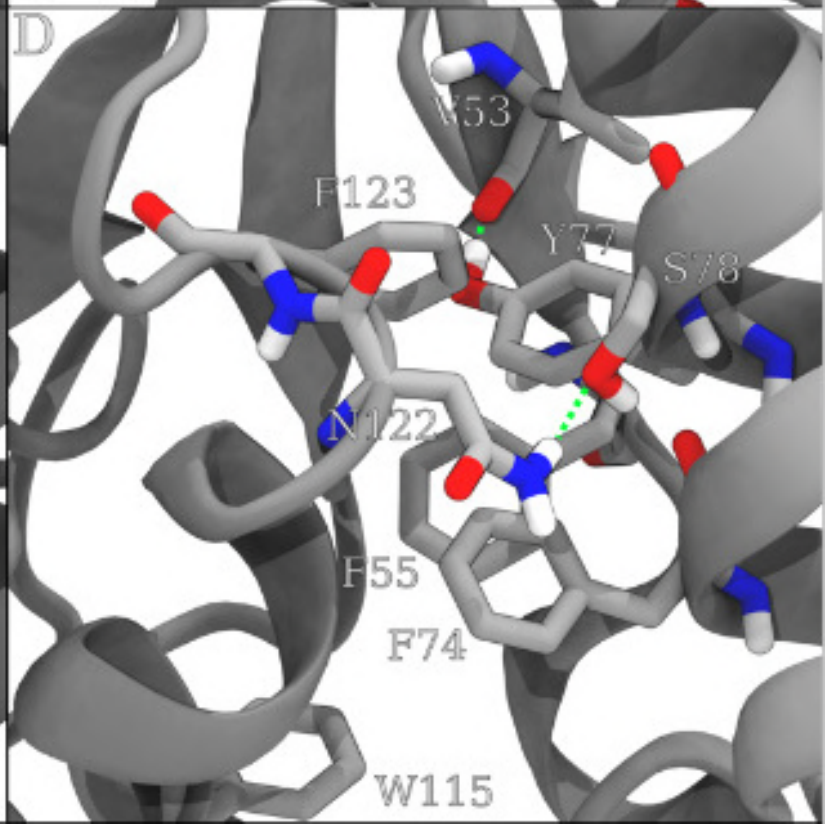

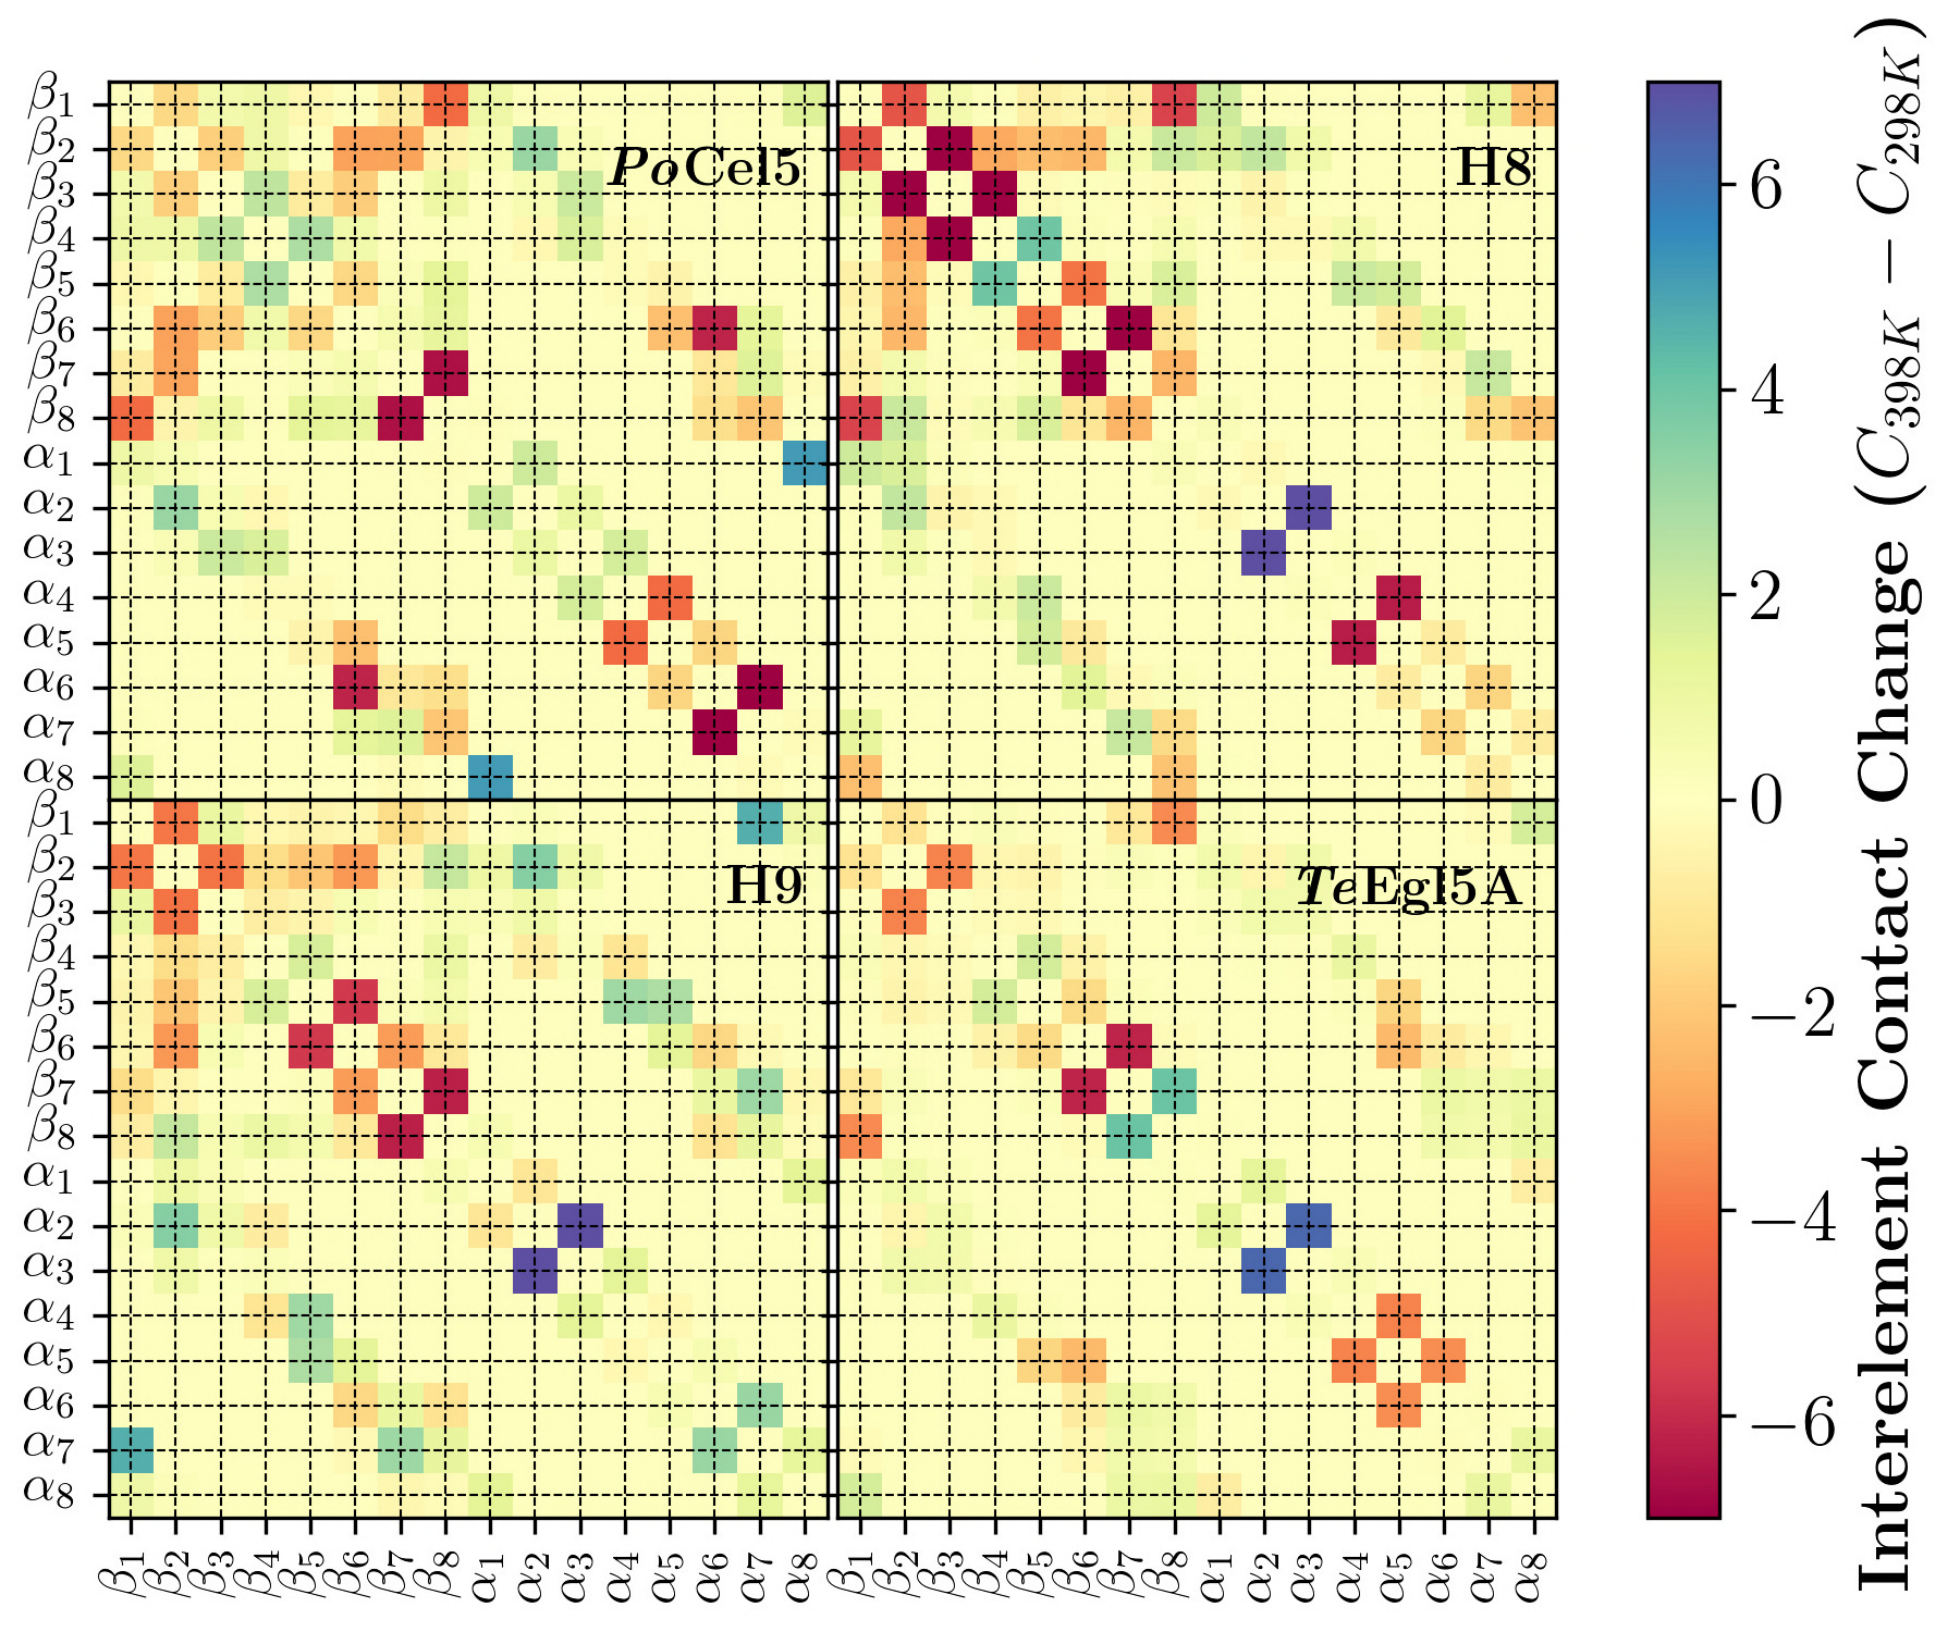

Source: https://www.biorxiv.org/content/10.1101/382069v1.full.pdf
